# Supplementary material for: Molecular, physiological, and biochemical characterization of extracellular lipase production by Aspergillus niger using submerged fermentation
Source: PeerJ journal article supplement (doi:10.7717/peerj.9425), 2020-07-07
Supplement: Figure_S1._Images_of_fungal_isolates.pdf [file Figure_S1._Images_of_fungal_isolates.pdf]

A

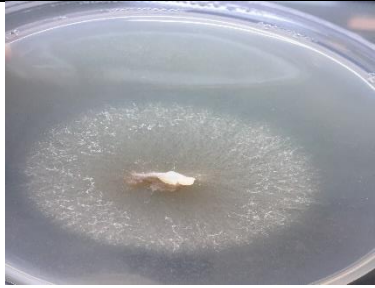

*Fusarium sp.*

B

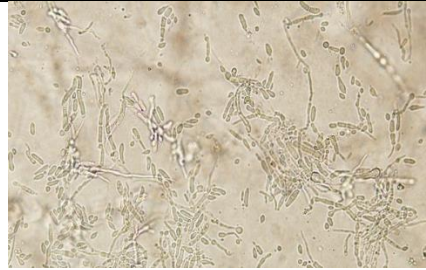

*Fusarium sp.*

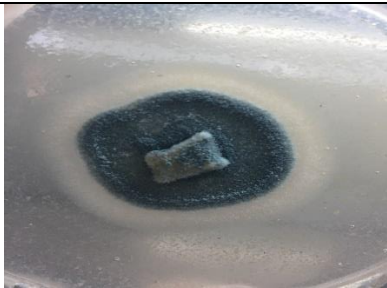

*Penicillium sp.1*

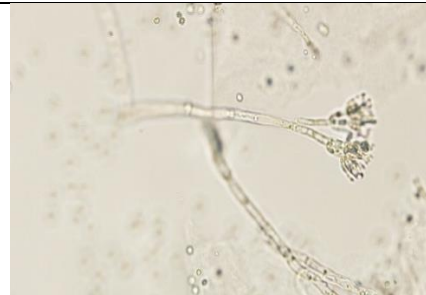

*Penicillium sp.1*

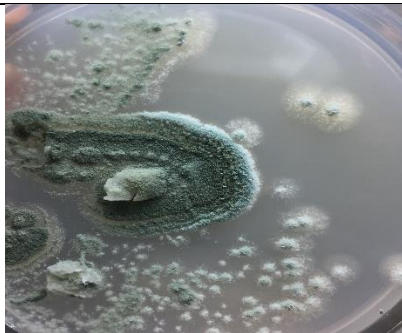

*Penicillium sp.2*

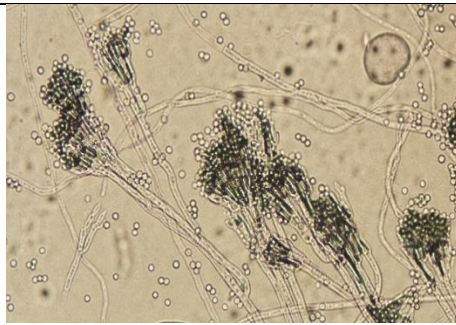

*Penicillium sp.2*

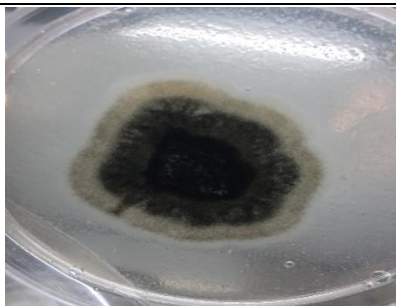

*Alternaria sp.*

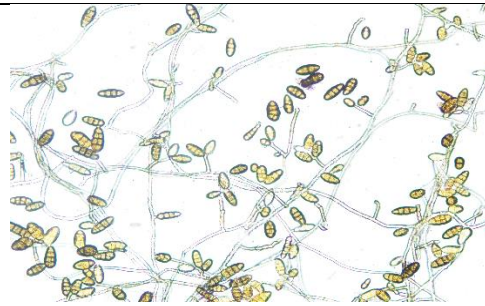

*Alternaria sp.*

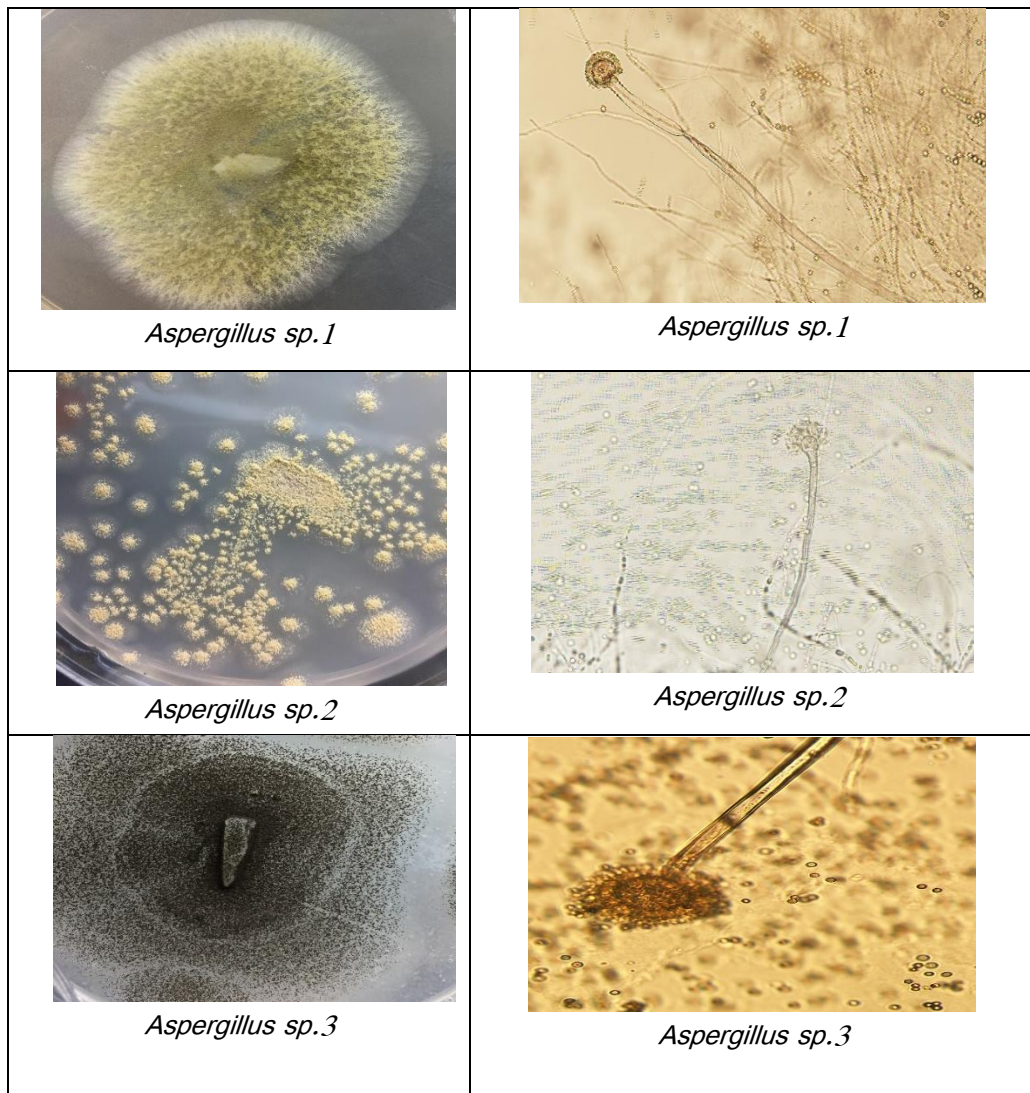

**Figure 1.** Images of fungal isolates for each genus isolated from different kinds of oil seeds, (A) Under microscope (40X) and (B) on a petri dish.
