# Supplementary material for: Molecular, physiological, and biochemical characterization of extracellular lipase production by Aspergillus niger using submerged fermentation
Source: PeerJ journal article supplement (doi:10.7717/peerj.9425), 2020-07-07
Supplement: Figure_S2._The_difference_between_lipase_producing.pdf [file Figure_S2._The_difference_between_lipase_producing.pdf]

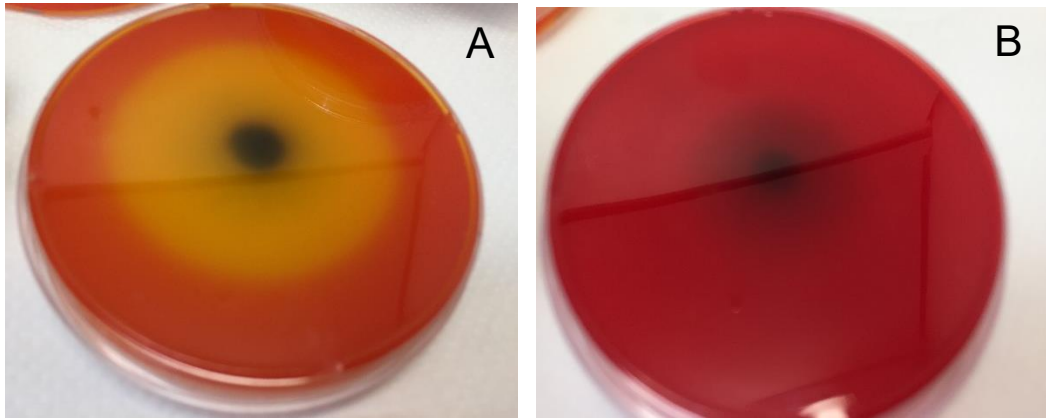

**Figure 2.** The difference between lipase producing and non- producing isolates on phenol red agar medium, (A) yellow zone indicates lipase production and (B) the absent of the yellow zone indicting no lipase production.
