# Supplementary material for: Molecular, physiological, and biochemical characterization of extracellular lipase production by Aspergillus niger using submerged fermentation
Source: PeerJ journal article supplement (doi:10.7717/peerj.9425), 2020-07-07
Supplement: Figure_S3._The_colorless_halo.pdf [file Figure_S3._The_colorless_halo.pdf]

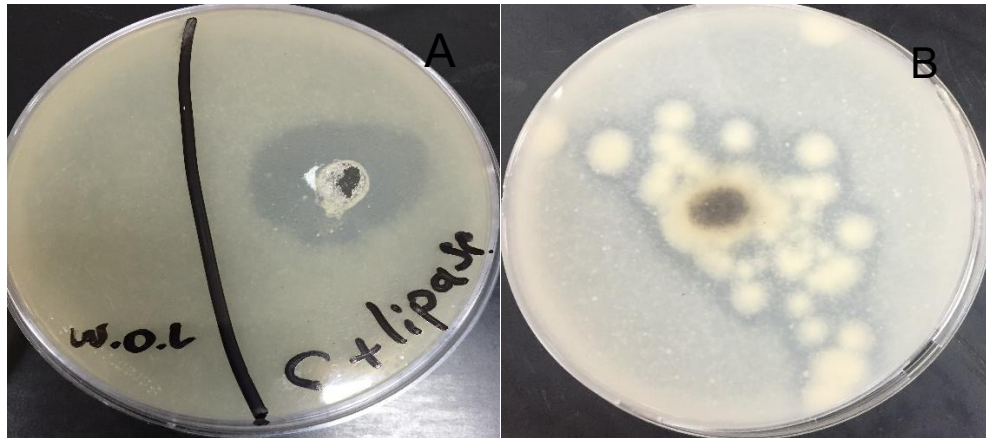

**Figure 3.** The colorless halo is formed by the hydrolysis of Tributyrin using commercial lipase enzyme (A) and by *Aspergillus* lipase production (B).
