# Supplementary material for: Molecular, physiological, and biochemical characterization of extracellular lipase production by Aspergillus niger using submerged fermentation
Source: PeerJ journal article supplement (doi:10.7717/peerj.9425), 2020-07-07
Supplement: Figure_S4._(A)_Under_microscope.pdf [file Figure_S4._(A)_Under_microscope.pdf]

| (A) Microscope (40X)                                                                                                                              | (B) Petri dish                                                                                                                                      |
|---------------------------------------------------------------------------------------------------------------------------------------------------|-----------------------------------------------------------------------------------------------------------------------------------------------------|
| 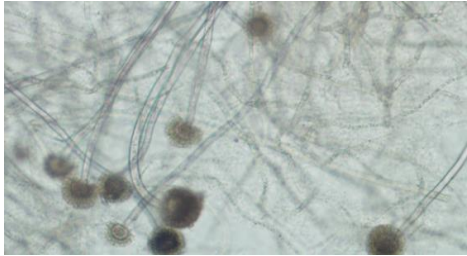 <p data-bbox="427 647 703 689"><i>A. niger</i> MH111398</p>     |  <p data-bbox="949 654 1225 696"><i>A. niger</i> MH111398</p>     |
|  <p data-bbox="411 967 687 1010"><i>A. niger</i> MH111399</p>    |  <p data-bbox="970 976 1246 1019"><i>A. niger</i> MH111399</p>    |
|  <p data-bbox="416 1310 687 1352"><i>A. niger</i> MH057541</p> |  <p data-bbox="954 1314 1225 1357"><i>A. niger</i> MH057541</p> |
|  <p data-bbox="406 1648 683 1691"><i>A. niger</i> MH111400</p> |  <p data-bbox="949 1666 1220 1709"><i>A. niger</i> MH111400</p> |

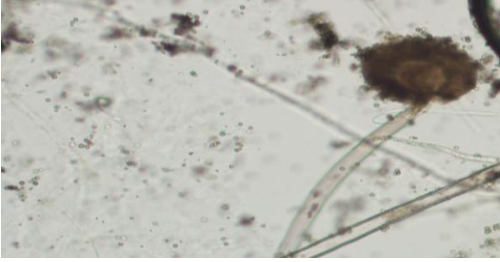

*A. niger* MH078513

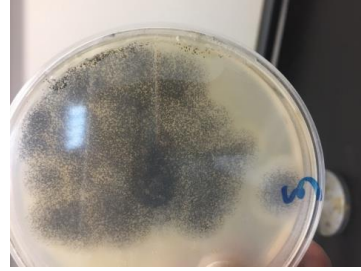

*A. niger* MH078513

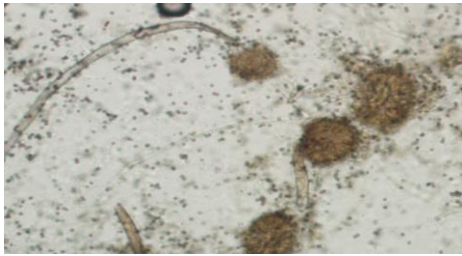

*A. niger* MH078565.1

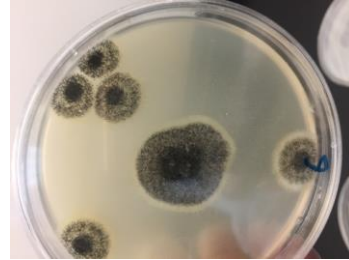

*A. niger* MH078565.1

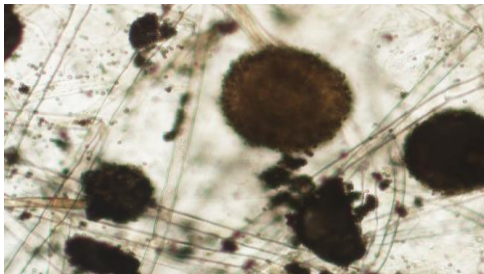

*A. niger* MH111401.1

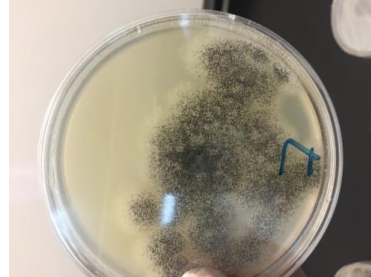

*A. niger* MH111401.1

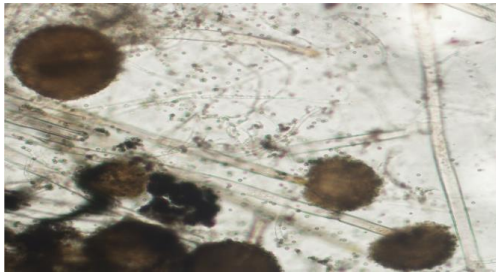

*A. niger* MH078566.1

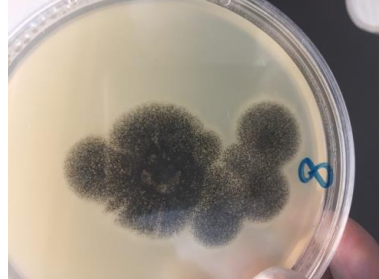

*A. niger* MH078566.1

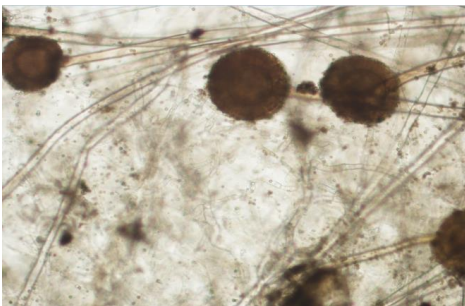

*A. niger* MH078571.1

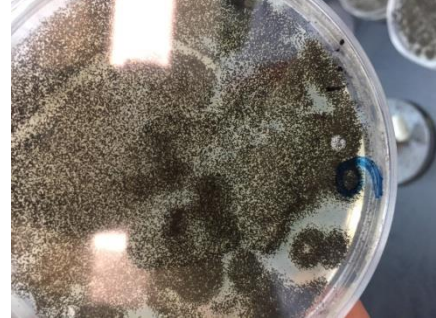

*A. niger* MH078571.1

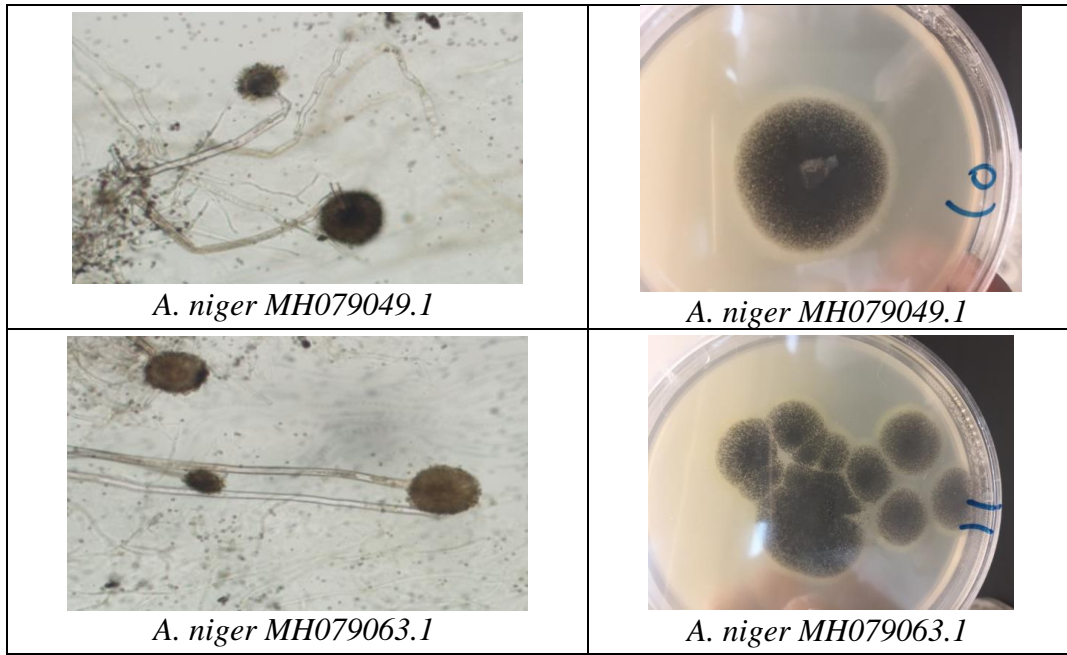

**Figure 4.** (A) Under microscope (40X) and (B) on a petri dish photo of the 11 *Aspergillus sp.* Isolates producing lipase enzyme and examined in the current study.
