# Supplementary material for: Molecular, physiological, and biochemical characterization of extracellular lipase production by Aspergillus niger using submerged fermentation
Source: PeerJ journal article supplement (doi:10.7717/peerj.9425), 2020-07-07
Supplement: Figure_S5._Lipase_gene_amplification.pdf [file Figure_S5._Lipase_gene_amplification.pdf]

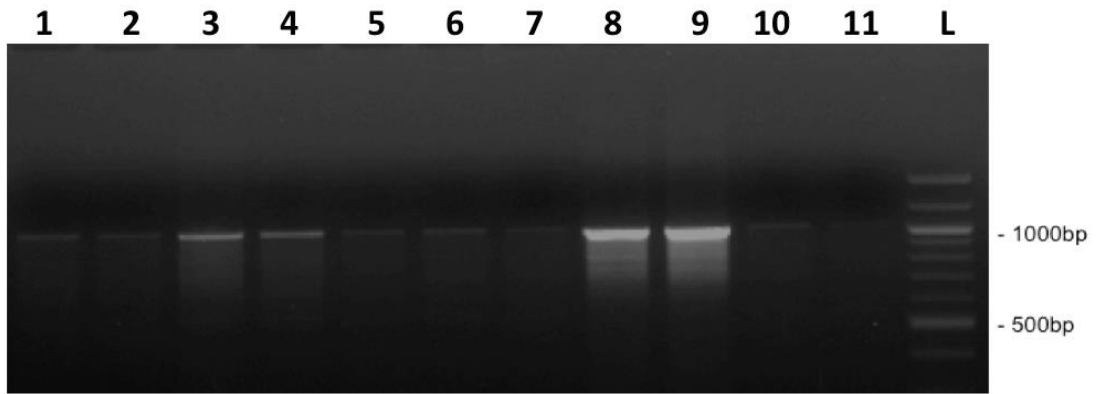

**Figure 5. Lipase gene amplification of DNA extracted from the 11 *Aspergillus niger* strains.** Amplicons were separated on agarose gels stained with ethidium bromide. Lane 1 through lane 11 are *A. niger* strains; MH111398.1, MH111399.1, MH057541.1, MH111400.1, MH078513.1, MH078565.1, MH111401.1, MH078566.1, MH078571.1, MH079049.1, MH079063.1 represent respectively. Lane 12 is 1-kb ladder (Quick-Load® 100 bp DNA Ladder, QIAGEN, Germany).
