# Supplementary material for: Molecular, physiological, and biochemical characterization of extracellular lipase production by Aspergillus niger using submerged fermentation
Source: PeerJ journal article supplement (doi:10.7717/peerj.9425), 2020-07-07
Supplement: peerj-44012-Table_S4._The_effect_of_various_incubation_times.pdf [file peerj-44012-Table_S4._The_effect_of_various_incubation_times.pdf]

**Table 4.** The effect of various incubation times on the enzymatic activity of the 5 highest lipase producers of *Aspergillus sp.* Isolates:

| Incubation time          | Lipase activity (U/ml) $\pm$ S.D | Dry weight (g/flask) $\pm$ S.D | Diameter (cm) $\pm$ S.D |
|--------------------------|----------------------------------|--------------------------------|-------------------------|
| <b>3 Days</b>            |                                  |                                |                         |
| <i>A. niger</i> MH111398 | 585.39 $\pm$ 14.41               | 0.656 $\pm$ 0.028              | 5.4 $\pm$ 0.361         |
| <i>A. niger</i> MH111400 | 558.21 $\pm$ 3.64                | 0.684 $\pm$ 0.016              | 6.4 $\pm$ 0.1           |
| <i>A. niger</i> MH078565 | 575.39 $\pm$ 12.38               | 0.527 $\pm$ 0.027              | 6.1 $\pm$ 0.173         |
| <i>A. niger</i> MH078571 | 630.26 $\pm$ 46.37               | 0.725 $\pm$ 0.063              | 6.3 $\pm$ 0.3           |
| <i>A. niger</i> MH079049 | 633.85 $\pm$ 17.74               | 0.728 $\pm$ 0.076              | 6.3 $\pm$ 0.289         |
| <b>5 Days</b>            |                                  |                                |                         |
| <i>A. niger</i> MH111398 | 550 $\pm$ 5.04                   | 0.747 $\pm$ 0.046              | 6.97 $\pm$ 0.252        |
| <i>A. niger</i> MH111400 | 508.97 $\pm$ 5.24                | 0.797 $\pm$ 0.018              | 7.33 $\pm$ 0.153        |
| <i>A. niger</i> MH078565 | 554.87 $\pm$ 3.87                | 0.697 $\pm$ 0.026              | 6.63 $\pm$ 0.116        |
| <i>A. niger</i> MH078571 | 608.97 $\pm$ 2.70                | 0.836 $\pm$ 0.052              | 7.27 $\pm$ 0.322        |
| <i>A. niger</i> MH079049 | 604.10 $\pm$ 0.89                | 0.797 $\pm$ 0.044              | 6.73 $\pm$ 0.306        |
| <b>7 Days</b>            |                                  |                                |                         |
| <i>A. niger</i> MH111398 | 423.33 $\pm$ 12.69               | 0.899 $\pm$ 0.047              | 7.07 $\pm$ 0.306        |
| <i>A. niger</i> MH111400 | 407.95 $\pm$ 2.22                | 0.870 $\pm$ 0.061              | 7.6 $\pm$ 0.173         |
| <i>A. niger</i> MH078565 | 503.85 $\pm$ 7.69                | 0.829 $\pm$ 0.043              | 6.77 $\pm$ 0.252        |
| <i>A. niger</i> MH078571 | 572.57 $\pm$ 1.18                | 0.967 $\pm$ 0.022              | 7.67 $\pm$ 0.289        |
| <i>A. niger</i> MH079049 | 554.36 $\pm$ 4.51                | 0.915 $\pm$ 0.034              | 7.43 $\pm$ 0.153        |
| <b>10 Days</b>           |                                  |                                |                         |
| <i>A. niger</i> MH111398 | 388.21 $\pm$ 3.55                | 0.987 $\pm$ 0.015              | 7.6 $\pm$ 0.2           |
| <i>A. niger</i> MH111400 | 361.28 $\pm$ 4.24                | 0.999 $\pm$ 0.028              | 7.67 $\pm$ 0.153        |
| <i>A. niger</i> MH078565 | 432.05 $\pm$ 5.97                | 0.933 $\pm$ 0.033              | 7.17 $\pm$ 0.153        |
| <i>A. niger</i> MH078571 | 552.82 $\pm$ 4.37                | 1.05 $\pm$ 0.084               | 7.83 $\pm$ 0.153        |
| <i>A. niger</i> MH079049 | 507.18 $\pm$ 8.23                | 1.06 $\pm$ 0.072               | 7.8 $\pm$ 0.2           |
| <b>15 Days</b>           |                                  |                                |                         |
| <i>A. niger</i> MH111398 | 348.21 $\pm$ 1.17                | 1.133 $\pm$ 0.186              | 7.83 $\pm$ 0.153        |
| <i>A. niger</i> MH111400 | 352.31 $\pm$ 6.71                | 1.132 $\pm$ 0.097              | 8 $\pm$ 0.000           |
| <i>A. niger</i> MH078565 | 367.69 $\pm$ 42.01               | 0.989 $\pm$ 0.014              | 7.97 $\pm$ 0.058        |
| <i>A. niger</i> MH078571 | 405.39 $\pm$ 4.80                | 1.195 $\pm$ 0.132              | 8 $\pm$ 0.000           |
| <i>A. niger</i> MH079049 | 385.39 $\pm$ 2.04                | 1.246 $\pm$ 0.054              | 8 $\pm$ 0.000           |

\* Results are averages of three replicates
