# Supplementary material for: Molecular, physiological, and biochemical characterization of extracellular lipase production by Aspergillus niger using submerged fermentation
Source: PeerJ journal article supplement (doi:10.7717/peerj.9425), 2020-07-07
Supplement: peerj-44012-Table_S6._The_effect_of_different_nitrogen_sources.pdf [file peerj-44012-Table_S6._The_effect_of_different_nitrogen_sources.pdf]

**Table 6.** The effect of different nitrogen sources on the enzymatic activity of the 5 highest lipase producers of *Aspergillus sp.* Isolates:

| Nitrogen source          | Lipase activity (U/ml) $\pm$ S.D | Dry weight (g/flask) $\pm$ S.D | Diameter (cm) $\pm$ S.D |
|--------------------------|----------------------------------|--------------------------------|-------------------------|
| <b>Peptone</b>           |                                  |                                |                         |
| <i>A. niger</i> MH111398 | 629.74 $\pm$ 4.51                | 1.103 $\pm$ 0.062              | 6.97 $\pm$ 0.252        |
| <i>A. niger</i> MH111400 | 620 $\pm$ 8.87                   | 1.308 $\pm$ 0.037              | 7.07 $\pm$ 0.208        |
| <i>A. niger</i> MH078565 | 619.36 $\pm$ 12.79               | 1.342 $\pm$ 0.041              | 7 $\pm$ 0.265           |
| <i>A. niger</i> MH078571 | 713.33 $\pm$ 2.22                | 1.396 $\pm$ 0.059              | 7.6 $\pm$ 0.200         |
| <i>A. niger</i> MH079049 | 710.51 $\pm$ 1.94                | 1.429 $\pm$ 0.081              | 7.4 $\pm$ 0.100         |
| <b>Yeast extract</b>     |                                  |                                |                         |
| <i>A. niger</i> MH111398 | 669.49 $\pm$ 10.61               | 1.037 $\pm$ 0.038              | 5.57 $\pm$ 0.153        |
| <i>A. niger</i> MH111400 | 678.97 $\pm$ 13.79               | 1.207 $\pm$ 0.090              | 6.63 $\pm$ 0.208        |
| <i>A. niger</i> MH078565 | 708.97 $\pm$ 5.12                | 1.133 $\pm$ 0.066              | 6.7 $\pm$ 0.100         |
| <i>A. niger</i> MH078571 | 741.54 $\pm$ 1.33                | 1.295 $\pm$ 0.060              | 6.93 $\pm$ 0.116        |
| <i>A. niger</i> MH079049 | 734.36 $\pm$ 3.87                | 1.309 $\pm$ 0.068              | 7.27 $\pm$ 0.208        |
| <b>Beef extract</b>      |                                  |                                |                         |
| <i>A. niger</i> MH111398 | 508.72 $\pm$ 8.85                | 0.979 $\pm$ 0.079              | 3.47 $\pm$ 0.058        |
| <i>A. niger</i> MH111400 | 321.28 $\pm$ 4.51                | 1.124 $\pm$ 0.062              | 3.6 $\pm$ 0.100         |
| <i>A. niger</i> MH078565 | 502.82 $\pm$ 3.47                | 1.04 $\pm$ 0.086               | 4.97 $\pm$ 0.058        |
| <i>A. niger</i> MH078571 | 482.05 $\pm$ 11.57               | 1.085 $\pm$ 0.156              | 4.63 $\pm$ 1.242        |
| <i>A. niger</i> MH079049 | 522.05 $\pm$ 3.95                | 1.204 $\pm$ 0.111              | 6.53 $\pm$ 0.153        |
| <b>NaNO<sub>3</sub></b>  |                                  |                                |                         |
| <i>A. niger</i> MH111398 | 562.05 $\pm$ 3.64                | 0.614 $\pm$ 0.028              | 4.63 $\pm$ 0.153        |
| <i>A. niger</i> MH111400 | 561.28 $\pm$ 25.76               | 0.702 $\pm$ 0.071              | 3.93 $\pm$ 0.116        |
| <i>A. niger</i> MH078565 | 518.72 $\pm$ 49.59               | 0.61 $\pm$ 0.040               | 5.47 $\pm$ 0.208        |
| <i>A. niger</i> MH078571 | 433.59 $\pm$ 3.64                | 0.729 $\pm$ 0.036              | 4.8 $\pm$ 0.200         |
| <i>A. niger</i> MH079049 | 411.54 $\pm$ 2.66                | 0.702 $\pm$ 0.026              | 5.2 $\pm$ 0.300         |
| <b>Casein</b>            |                                  |                                |                         |
| <i>A. niger</i> MH111398 | 572.31 $\pm$ 4.68                | 0.773 $\pm$ 0.025              | 3.27 $\pm$ 0.252        |
| <i>A. niger</i> MH111400 | 448.21 $\pm$ 8.92                | 0.911 $\pm$ 0.026              | 3.3 $\pm$ 0.265         |
| <i>A. niger</i> MH078565 | 281.28 $\pm$ 6.89                | 0.771 $\pm$ 0.021              | 4.13 $\pm$ 0.116        |
| <i>A. niger</i> MH078571 | 315.64 $\pm$ 4.24                | 0.892 $\pm$ 0.064              | 4.47 $\pm$ 0.153        |
| <i>A. niger</i> MH079049 | 429.49 $\pm$ 9.92                | 0.779 $\pm$ 0.069              | 5.73 $\pm$ 0.252        |
| <b>KNO<sub>3</sub></b>   |                                  |                                |                         |
| <i>A. niger</i> MH111398 | 483.08 $\pm$ 5.81                | 0.518 $\pm$ 0.036              | 4.37 $\pm$ 0.153        |
| <i>A. niger</i> MH111400 | 438.21 $\pm$ 5.40                | 0.607 $\pm$ 0.037              | 3.83 $\pm$ 0.153        |
| <i>A. niger</i> MH078565 | 459.74 $\pm$ 7.59                | 0.526 $\pm$ 0.085              | 4.3 $\pm$ 0.252         |

|                          |             |             |            |
|--------------------------|-------------|-------------|------------|
| <i>A. niger</i> MH078571 | 486.67±7.11 | 0.819±0.070 | 3.6±0.100  |
| <i>A. niger</i> MH079049 | 494.62±6.30 | 0.839±0.064 | 5.73±0.252 |

\* Results are averages of three replicates
