# Supplementary material for: Molecular, physiological, and biochemical characterization of extracellular lipase production by Aspergillus niger using submerged fermentation
Source: PeerJ journal article supplement (doi:10.7717/peerj.9425), 2020-07-07
Supplement: peerj-44012-Table_S8._The_effect_of_various_oil_types.pdf [file peerj-44012-Table_S8._The_effect_of_various_oil_types.pdf]

**Table 8.** The effect of various oil types on the enzymatic activity of the 5 highest lipase producers of *Aspergillus sp.* Isolates:

| Oil type (%)             | Lipase activity (U/ml) $\pm$ S.D | dry weight (g/flask) $\pm$ S.D | Diameter (cm) $\pm$ S.D |
|--------------------------|----------------------------------|--------------------------------|-------------------------|
| <b>Olive oil 1.5%</b>    |                                  |                                |                         |
| <i>A. niger</i> MH111398 | 557.69 $\pm$ 4.07                | 0.864 $\pm$ 0.136              | 5.2 $\pm$ 0.436         |
| <i>A. niger</i> MH111400 | 554.1 $\pm$ 5.12                 | 0.741 $\pm$ 0.033              | 5.07 $\pm$ 0.322        |
| <i>A. niger</i> MH078565 | 586.41 $\pm$ 0.44                | 0.623 $\pm$ 0.030              | 4.3 $\pm$ 0.458         |
| <i>A. niger</i> MH078571 | 594.36 $\pm$ 0.89                | 0.791 $\pm$ 0.041              | 4.27 $\pm$ 0.252        |
| <i>A. niger</i> MH079049 | 571.8 $\pm$ 3.47                 | 0.703 $\pm$ 0.072              | 4.43 $\pm$ 0.116        |
| <b>Olive oil 2%</b>      |                                  |                                |                         |
| <i>A. niger</i> MH111398 | 664.36 $\pm$ 2.91                | 0.946 $\pm$ 0.093              | 5.77 $\pm$ 0.306        |
| <i>A. niger</i> MH111400 | 670.51 $\pm$ 6.17                | 1.014 $\pm$ 0.188              | 4.97 $\pm$ 0.451        |
| <i>A. niger</i> MH078565 | 697.69 $\pm$ 5.04                | 0.955 $\pm$ 0.040              | 4.37 $\pm$ 0.208        |
| <i>A. niger</i> MH078571 | 735.9 $\pm$ 1.78                 | 1.137 $\pm$ 0.149              | 3.27 $\pm$ 0.252        |
| <i>A. niger</i> MH079049 | 728.21 $\pm$ 4.24                | 1.232 $\pm$ 0.142              | 4.17 $\pm$ 0.416        |
| <b>Olive oil 2.5%</b>    |                                  |                                |                         |
| <i>A. niger</i> MH111398 | 664.87 $\pm$ 13.26               | 1.072 $\pm$ 0.103              | 2.6 $\pm$ 0.322         |
| <i>A. niger</i> MH111400 | 598.21 $\pm$ 6.54                | 1.034 $\pm$ 0.155              | 2.7 $\pm$ 0.751         |
| <i>A. niger</i> MH078565 | 672.05 $\pm$ 21.54               | 1.277 $\pm$ 0.149              | 4.27 $\pm$ 0.404        |
| <i>A. niger</i> MH078571 | 674.36 $\pm$ 1.18                | 1.041 $\pm$ 0.110              | 2.53 $\pm$ 0.058        |
| <i>A. niger</i> MH079049 | 688.21 $\pm$ 0.44                | 1.039 $\pm$ 0.093              | 3.9 $\pm$ 0.529         |
| <b>Corn oil 1.5%</b>     |                                  |                                |                         |
| <i>A. niger</i> MH111398 | 507.95 $\pm$ 65.54               | 0.617 $\pm$ 0.059              | 4.23 $\pm$ 0.208        |
| <i>A. niger</i> MH111400 | 477.95 $\pm$ 17.45               | 0.52 $\pm$ 0.086               | 6.63 $\pm$ 0.322        |
| <i>A. niger</i> MH078565 | 484.1 $\pm$ 15.04                | 0.717 $\pm$ 0.029              | 6.17 $\pm$ 0.208        |
| <i>A. niger</i> MH078571 | 450.77 $\pm$ 29.80               | 0.836 $\pm$ 0.050              | 4.17 $\pm$ 0.153        |
| <i>A. niger</i> MH079049 | 481.54 $\pm$ 24.24               | 0.848 $\pm$ 0.126              | 4.9 $\pm$ 0.265         |
| <b>Corn oil 2%</b>       |                                  |                                |                         |
| <i>A. niger</i> MH111398 | 520.26 $\pm$ 2.47                | 0.613 $\pm$ 0.031              | 3.77 $\pm$ 0.252        |
| <i>A. niger</i> MH111400 | 537.44 $\pm$ 6.72                | 0.663 $\pm$ 0.085              | 4.73 $\pm$ 0.252        |
| <i>A. niger</i> MH078565 | 525.13 $\pm$ 21.88               | 0.719 $\pm$ 0.091              | 3.57 $\pm$ 0.208        |
| <i>A. niger</i> MH078571 | 543.08 $\pm$ 40.09               | 0.863 $\pm$ 0.112              | 4.7 $\pm$ 0.361         |
| <i>A. niger</i> MH079049 | 566.67 $\pm$ 94.95               | 0.834 $\pm$ 0.100              | 4.77 $\pm$ 0.306        |
| <b>Corn oil 2.5%</b>     |                                  |                                |                         |
| <i>A. niger</i> MH111398 | 651.03 $\pm$ 8.23                | 0.662 $\pm$ 0.054              | 4.5 $\pm$ 0.2           |
| <i>A. niger</i> MH111400 | 645.64 $\pm$ 5.67                | 0.614 $\pm$ 0.102              | 3.87 $\pm$ 0.306        |
| <i>A. niger</i> MH078565 | 608.46 $\pm$ 1.54                | 0.620 $\pm$ 0.079              | 3.8 $\pm$ 0.300         |

|                          |              |             |            |
|--------------------------|--------------|-------------|------------|
| <i>A. niger</i> MH078571 | 618.97±14.72 | 0.838±0.078 | 4.17±0.252 |
| <i>A. niger</i> MH079049 | 590.51±31.76 | 0.888±0.112 | 4.3±0.2    |
| <b>Sun flower 1.5%</b>   |              |             |            |
| <i>A. niger</i> MH111398 | 534.87±47.78 | 0.849±0.056 | 4.07±0.306 |
| <i>A. niger</i> MH111400 | 517.69±1.18  | 0.822±0.038 | 6.6±0.361  |
| <i>A. niger</i> MH078565 | 484.36±0.44  | 0.692±0.064 | 6.23±0.208 |
| <i>A. niger</i> MH078571 | 532.31±18.46 | 0.703±0.056 | 5.03±0.351 |
| <i>A. niger</i> MH079049 | 540.51±25.38 | 0.777±0.023 | 5.9±0.173  |
| <b>Sun flower 2%</b>     |              |             |            |
| <i>A. niger</i> MH111398 | 540.77±2.77  | 0.908±0.160 | 6.87±0.153 |
| <i>A. niger</i> MH111400 | 540±51.61    | 0.844±0.058 | 6.5±0.500  |
| <i>A. niger</i> MH078565 | 536.41±2.35  | 0.739±0.067 | 4.57±0.058 |
| <i>A. niger</i> MH078571 | 537.95±5.88  | 0.88±0.048  | 4.77±0.208 |
| <i>A. niger</i> MH079049 | 546.16±1.54  | 0.88±0.016  | 5.6±0.100  |
| <b>Sun flower 2.5 %</b>  |              |             |            |
| <i>A. niger</i> MH111398 | 538.97±2.35  | 0.775±0.061 | 4.17±1.012 |
| <i>A. niger</i> MH111400 | 517.69±15.13 | 0.745±0.037 | 4.7±0.300  |
| <i>A. niger</i> MH078565 | 498.72±40.77 | 0.836±0.120 | 5.27±0.252 |
| <i>A. niger</i> MH078571 | 532.31±6.92  | 0.681±0.061 | 4.87±0.153 |
| <i>A. niger</i> MH079049 | 540.53±54.23 | 0.692±0.079 | 4.6±0.100  |
| <b>Castor oil 1.5%</b>   |              |             |            |
| <i>A. niger</i> MH111398 | 473.08±9.36  | 0.685±0.045 | 4.5±0.173  |
| <i>A. niger</i> MH111400 | 488.46±4.68  | 0.924±0.238 | 3.87±0.231 |
| <i>A. niger</i> MH078565 | 507.44±15.10 | 0.845±0.085 | 3.23±0.252 |
| <i>A. niger</i> MH078571 | 497.69±8.74  | 0.807±0.014 | 4.37±0.252 |
| <i>A. niger</i> MH079049 | 502.31±3.53  | 0.81±0.047  | 5.17±0.153 |
| <b>Castor oil 2%</b>     |              |             |            |
| <i>A. niger</i> MH111398 | 505.13±5.97  | 0.766±0.046 | 3.43±0.208 |
| <i>A. niger</i> MH111400 | 577.18±7.47  | 0.795±0.062 | 3.2±0.2    |
| <i>A. niger</i> MH078565 | 628.46±18.95 | 0.764±0.161 | 2.97±0.058 |
| <i>A. niger</i> MH078571 | 694.36±25.19 | 0.779±0.074 | 4.17±0.153 |
| <i>A. niger</i> MH079049 | 698.72±7.34  | 0.934±0.036 | 5.43±0.116 |
| <b>Castor oil 2.5%</b>   |              |             |            |
| <i>A. niger</i> MH111398 | 491.54±7.34  | 0.875±0.019 | 2.1±0.1    |
| <i>A. niger</i> MH111400 | 572.05±13.20 | 0.847±0.173 | 1.97±0.153 |
| <i>A. niger</i> MH078565 | 565.39±2.77  | 1.04±0.296  | 3.07±0.493 |
| <i>A. niger</i> MH078571 | 565.9±5.12   | 0.926±0.102 | 3.23±0.252 |

|                          |              |             |            |
|--------------------------|--------------|-------------|------------|
| <i>A. niger</i> MH079049 | 588.46±2.04  | 0.929±0.160 | 5.3±0.3    |
| <b>Palm oil 15%</b>      |              |             |            |
| <i>A. niger</i> MH111398 | 662.82±5.24  | 0.657±0.053 | 3.17±0.153 |
| <i>A. niger</i> MH111400 | 667.69±14.68 | 0.605±0.034 | 3.03±0.058 |
| <i>A. niger</i> MH078565 | 710.51±5.77  | 0.676±0.086 | 2.47±0.058 |
| <i>A. niger</i> MH078571 | 735.64±1.60  | 0.743±0.136 | 3.73±0.252 |
| <i>A. niger</i> MH079049 | 731.8±0.44   | 0.582±0.057 | 5.03±0.252 |
| <b>Palm oil 2%</b>       |              |             |            |
| <i>A. niger</i> MH111398 | 692.56±3.11  | 0.677±0.059 | 3.07±0.153 |
| <i>A. niger</i> MH111400 | 710.26±11.26 | 0.645±0.125 | 4.1±0.1    |
| <i>A. niger</i> MH078565 | 726.41±3.64  | 0.645±0.054 | 3.53±0.058 |
| <i>A. niger</i> MH078571 | 772.05±0.44  | 0.656±0.031 | 4.97±0.208 |
| <i>A. niger</i> MH079049 | 758.46±18.80 | 0.641±0.067 | 5.07±0.306 |
| <b>Palm oil 2.5%</b>     |              |             |            |
| <i>A. niger</i> MH111398 | 663.85±2.04  | 0.639±0.001 | 2.93±0.116 |
| <i>A. niger</i> MH111400 | 667.44±8.23  | 0.638±0.048 | 3.97±0.153 |
| <i>A. niger</i> MH078565 | 635.39±9.61  | 0.625±0.094 | 5.37±0.379 |
| <i>A. niger</i> MH078571 | 740.77±2.04  | 0.642±0.070 | 4.07±0.116 |
| <i>A. niger</i> MH079049 | 723.078±8.14 | 0.666±0.042 | 4.9±0.1    |
| <b>Soy bean 1.5%</b>     |              |             |            |
| <i>A. niger</i> MH111398 | 535.13±7.74  | 0.631±0.103 | 3.8±0.200  |
| <i>A. niger</i> MH111400 | 540.52±2.35  | 0.597±0.076 | 5.63±0.153 |
| <i>A. niger</i> MH078565 | 508.72±14.29 | 0.669±0.005 | 3.8±0.200  |
| <i>A. niger</i> MH078571 | 530.52±30.19 | 0.661±0.053 | 4.7±0.200  |
| <i>A. niger</i> MH079049 | 538.47±4.28  | 0.69±0.023  | 4.67±0.116 |
| <b>Soy bean 2%</b>       |              |             |            |
| <i>A. niger</i> MH111398 | 550.26±2.91  | 0.603±0.025 | 4.17±0.153 |
| <i>A. niger</i> MH111400 | 557.69±10.91 | 0.721±0.044 | 4.5±0.100  |
| <i>A. niger</i> MH078565 | 547.95±2.47  | 0.715±0.033 | 4.07±0.208 |
| <i>A. niger</i> MH078571 | 535.9±4.44   | 0.675±0.048 | 5.37±0.252 |
| <i>A. niger</i> MH079049 | 558.72±3.64  | 0.620±0.074 | 5.73±0.252 |
| <b>Soy bean 2.5%</b>     |              |             |            |
| <i>A. niger</i> MH111398 | 537.7±7.05   | 0.712±0.011 | 4.13±0.153 |
| <i>A. niger</i> MH111400 | 524.11±2.70  | 0.698±0.030 | 6.03±0.252 |
| <i>A. niger</i> MH078565 | 519.75±8.47  | 0.686±0.066 | 4.27±0.153 |
| <i>A. niger</i> MH078571 | 522.57±5.12  | 0.643±0.011 | 5.43±0.379 |
| <i>A. niger</i> MH079049 | 525.39±4.07  | 0.705±0.067 | 5.3±0.173  |

\* Results are averages of three replicates
