# Supplementary material for: Molecular, physiological, and biochemical characterization of extracellular lipase production by Aspergillus niger using submerged fermentation
Source: PeerJ. 2020 Jul 7;8:e9425. doi: 10.7717/peerj.9425 (PMC7350912; doi:10.7717/peerj.9425)
Supplement: Supplemental Information 14 [file peerj-08-9425-s014.xlsx]

## Sheet: ورقة1
15 C	A	B	C	AVERAGE	U / ml
A. niger MH111398.1	0.276	0.278	0.282	0.278667	49.7436
A. niger MH111400.1	0.243	0.243	0.233	0.239667	19.7436
A. niger MH078565.1	0.35	0.298	0.342	0.33	89.2308
A. niger MH078571.1	0.371	0.352	0.394	0.372333	121.795
A. niger MH079049.1	0.254	0.252	0.233	0.246333	24.8718
20 C	A	B	C
A. niger MH111398.1	0.406	0.412	0.431	0.416333	155.641
A. niger MH111400.1	0.463	0.447	0.462	0.457333	187.179
A. niger MH078565.1	0.502	0.492	0.486	0.493333	214.872
A. niger MH078571.1	0.568	0.577	0.579	0.574667	277.436
A. niger MH079049.1	0.553	0.541	0.515	0.536333	247.949
25 C	A	B	C
A. niger MH111398.1	0.635	0.631	0.641	0.635667	324.359
A. niger MH111400.1	0.547	0.552	0.564	0.554333	261.795
A. niger MH078565.1	0.579	0.566	0.575	0.573333	276.41
A. niger MH078571.1	0.73	0.712	0.706	0.716	386.154
A. niger MH079049.1	0.733	0.736	0.742	0.737	402.308
30 C	A	B	C
A. niger MH111398.1	0.639	0.651	0.656	0.648667	334.359
A. niger MH111400.1	0.635	0.64	0.652	0.642333	329.487
A. niger MH078565.1	0.748	0.731	0.752	0.743667	407.436
A. niger MH078571.1	0.796	0.802	0.781	0.793	445.385
A. niger MH079049.1	0.798	0.784	0.799	0.793667	445.897
35 C	A	B	C
A. niger MH111398.1	0.746	0.742	0.751	0.746333	409.487
A. niger MH111400.1	0.731	0.773	0.78	0.761333	421.026
A. niger MH078565.1	0.784	0.777	0.785	0.782	436.923
A. niger MH078571.1	0.865	0.847	0.831	0.847667	487.436
A. niger MH079049.1	0.863	0.878	0.854	0.865	500.769
40 C	A	B	C
A. niger MH111398.1	0.835	0.858	0.863	0.852	490.769
A. niger MH111400.1	0.813	0.821	0.843	0.825667	470.513
A. niger MH078565.1	0.853	0.826	0.838	0.839	480.769
A. niger MH078571.1	0.955	0.956	0.977	0.962667	575.897
A. niger MH079049.1	0.952	0.963	0.947	0.954	569.231
45 C	A	B	C
A. niger MH111398.1
A. niger MH111400.1
A. niger MH078565.1
A. niger MH078571.1	0.741	0.732	0.742	0.738333	403.333
A. niger MH079049.1	0.905	0.897	0.887	0.896333	524.872
