# Supplementary material for: Molecular, physiological, and biochemical characterization of extracellular lipase production by Aspergillus niger using submerged fermentation
Source: PeerJ. 2020 Jul 7;8:e9425. doi: 10.7717/peerj.9425 (PMC7350912; doi:10.7717/peerj.9425)
Supplement: Supplemental Information 15 [file peerj-08-9425-s015.xlsx]

## Sheet: ورقة1
				absorbance	U / L	wight	line growth
3 PH	A	B	C	average		average	averagea
A. niger MH111398.1	0.223	0.217	0.233	0.224333	11.0256	0.371233
A. niger MH111400.1	0.233	0.241	0.24	0.238	21.5385	0.4014
A. niger MH078565.1	0.216	0.216	0.219	0.217	5.38462	0.2864
A. niger MH078571.1	0.32	0.314	0.32	0.318	83.0769	0.353267
A. niger MH079049.1	0.317	0.308	0.331	0.318667	83.5897	0.349467
3.5 PH	A	B	C				averagea
A. niger MH111398.1	0.314	0.316	0.305	0.311667	78.2051	0.270067
A. niger MH111400.1	0.275	0.263	0.273	0.270333	46.4103	0.269433
A. niger MH078565.1	0.247	0.234	0.235	0.238667	22.0513	0.346467
A. niger MH078571.1	0.37	0.367	0.356	0.364333	118.718	0.342167
A. niger MH079049.1	0.337	0.341	0.342	0.34	100	0.349867
4 PH	A	B	C				averagea
A. niger MH111398.1	0.321	0.332	0.326	0.326333	89.4872	0.364533
A. niger MH111400.1	0.313	0.303	0.31	0.308667	75.8974	0.386133
A. niger MH078565.1	0.275	0.255	0.257	0.262333	40.2564	0.488267
A. niger MH078571.1	0.415	0.422	0.415	0.417333	159.487	0.425767
A. niger MH079049.1	0.368	0.365	0.366	0.366333	120.256	0.449733
4.5 PH
A. niger MH111398.1	0.365	0.346	0.342	0.351	108.462	0.440433	3.53333
A. niger MH111400.1	0.335	0.34	0.353	0.342667	102.051	0.4278	3.43333
A. niger MH078565.1	0.32	0.287	0.289	0.298667	68.2051	0.4437	3.8
A. niger MH078571.1	0.447	0.447	0.452	0.448667	183.59	0.4853	3.93333
A. niger MH079049.1	0.415	0.43	0.419	0.421333	162.564	0.495867	4.33333
5 PH	A	B	C
A. niger MH111398.1	0.421	0.424	0.404	0.416333	158.718	0.240067	4.26667
A. niger MH111400.1	0.398	0.378	0.378	0.384667	134.359	0.437367	4.4
A. niger MH078565.1	0.334	0.323	0.336	0.331	93.0769	0.392467	5.06667
A. niger MH078571.1	0.487	0.489	0.505	0.493667	218.205	0.356	5.4
A. niger MH079049.1	0.474	0.476	0.482	0.477333	205.641	0.382133	5.53333
5.5 PH	A	B	C
A. niger MH111398.1	0.524	0.525	0.509	0.519333	237.949	0.2614	4.83333
A. niger MH111400.1	0.424	0.414	0.422	0.42	161.538	0.332167	4.46667
A. niger MH078565.1	0.473	0.463	0.47	0.468667	198.974	0.3082	4.7
A. niger MH078571.1	0.565	0.576	0.577	0.572667	278.974	0.311667	4.73333
A. niger MH079049.1	0.551	0.567	0.567	0.561667	270.513	0.378767	5.26667
6 PH	A	B	C
A. niger MH111398.1	0.67	0.657	0.663	0.663333	348.718	0.477367	4.3
A. niger MH111400.1	0.686	0.701	0.674	0.687	366.923	0.5191	4.33333
A. niger MH078565.1	0.645	0.63	0.663	0.646	335.385	0.513967	4.56667
A. niger MH078571.1	0.754	0.767	0.786	0.769	430	0.6013	4.8
A. niger MH079049.1	0.764	0.775	0.744	0.761	423.846	0.591433	4.36667
6.5	A	B	C
A. niger MH111398.1	0.856	0.848	0.846	0.85	492.308	0.540033	3.06667
A. niger MH111400.1	0.821	0.825	0.82	0.822	470.769	0.583867	3.66667
A. niger MH078565.1	0.828	0.829	0.834	0.830333	477.179	0.670667	3.03333
A. niger MH078571.1	0.963	0.962	0.957	0.960667	577.436	0.637933	3.6
A. niger MH079049.1	0.943	0.945	0.954	0.947333	567.179	0.6563	3.96667
7 PH	A	B	C
A. niger MH111398.1	0.876	0.866	0.853	0.865	503.846	0.643	4.36667
A. niger MH111400.1	0.855	0.843	0.846	0.848	490.769	0.607067	4.73333
A. niger MH078565.1	0.864	0.84	0.866	0.856667	497.436	0.637733	4.66667
A. niger MH078571.1	0.978	0.971	0.975	0.974667	588.205	0.685133	4.7
A. niger MH079049.1	0.984	0.972	0.985	0.980333	592.564	0.685933	4.63333
7.5 PH	A	B	C
A. niger MH111398.1	0.932	0.92	0.921	0.924333	549.487	0.448867	5.5
A. niger MH111400.1	0.87	0.874	0.876	0.873333	510.256	0.276433	5.26667
A. niger MH078565.1	0.936	0.933	0.921	0.93	553.846	0.2712	5.2
A. niger MH078571.1	0.996	1.005	1.011	1.004	610.769	0.2676	5.6
A. niger MH079049.1	1.005	0.996	0.993	0.998	606.154	0.3205	5.8
8 PH	A	B	C
A. niger MH111398.1	0.842	0.835	0.841	0.839333	484.103	0.400633	4.8
A. niger MH111400.1	0.783	0.8	0.785	0.789333	445.641	0.434067	4.66667
A. niger MH078565.1	0.82	0.842	0.832	0.831333	477.949	0.345667	4.6
A. niger MH078571.1	0.889	0.88	0.85	0.873	510	0.306603	4.86667
A. niger MH079049.1	0.845	0.843	0.842	0.843333	487.179	0.5122	5.33333
8.5 PH	A	B	C
A. niger MH078571.1	0.822	0.826	0.83	0.826	473.846	0.374	4.46667
A. niger MH079049.1	0.81	0.824	0.831	0.821667	470.513	0.475	4.7
