# Supplementary material for: Molecular, physiological, and biochemical characterization of extracellular lipase production by Aspergillus niger using submerged fermentation
Source: PeerJ. 2020 Jul 7;8:e9425. doi: 10.7717/peerj.9425 (PMC7350912; doi:10.7717/peerj.9425)
Supplement: Supplemental Information 16 [file peerj-08-9425-s016.xlsx]

## Sheet: ورقة1
3 DAY	A	B	C	absorbance	U / L	DRY growth	line growth
A. niger MH111398.1	0.986	0.95	0.977	0.971	585.385	0.6558	5.4
A. niger MH111400.1	0.934	0.932	0.941	0.935667	558.205	0.6836	6.4
A. niger MH078565.1	0.976	0.945	0.953	0.958	575.385	0.5269	6.1
A. niger MH078571.1	1.052	1.075	0.961	1.02933	630.256	0.724533	6.3
A. niger MH079049.1	1.052	1.042	1.008	1.034	633.846	0.727733	6.33333
5 D	A	B	C
A. niger MH111398.1	0.919	0.924	0.932	0.925	550	0.7473	6.96667
A. niger MH111400.1	0.864	0.874	0.877	0.871667	508.974	0.7965	7.33333
A. niger MH078565.1	0.926	0.932	0.936	0.931333	554.872	0.697	6.63333
A. niger MH078571.1	1.005	0.998	1.002	1.00167	608.974	0.835667	7.26667
A. niger MH079049.1	0.996	0.994	0.996	0.995333	604.103	0.796567	6.73333
7 D	A	B	C
A. niger MH111398.1	0.765	0.774	0.742	0.760333	423.333	0.899533	7.06667
A. niger MH111400.1	0.742	0.737	0.742	0.740333	407.949	0.870167	7.6
A. niger MH078565.1	0.855	0.875	0.865	0.865	503.846	0.8292	6.76667
A. niger MH078571.1	0.953	0.954	0.956	0.954333	572.564	0.9671	7.66667
A. niger MH079049.1	0.933	0.935	0.924	0.930667	554.359	0.914733	7.43333
10 D	A	B	C
A. niger MH111398.1	0.712	0.72	0.712	0.714667	388.205	0.986867	7.6
A. niger MH111400.1	0.685	0.674	0.68	0.679667	361.282	0.9998	7.66667
A. niger MH078565.1	0.763	0.778	0.774	0.771667	432.051	0.933133	7.16667
A. niger MH078571.1	0.927	0.935	0.924	0.928667	552.821	1.0491	7.83333
A. niger MH079049.1	0.876	0.875	0.857	0.869333	507.179	1.0637	7.8
15 D	A	B	C
A. niger MH111398.1	0.661	0.664	0.663	0.662667	348.205	1.13237	7.83333
A. niger MH111400.1	0.672	0.658	0.674	0.668	352.308	1.13167	8
A. niger MH078565.1	0.717	0.722	0.625	0.688	367.692	0.9889	7.96667
A. niger MH078571.1	0.744	0.732	0.735	0.737	405.385	1.195	8
A. niger MH079049.1	0.714	0.71	0.709	0.711	385.385	1.24567	8
