# Supplementary material for: Molecular, physiological, and biochemical characterization of extracellular lipase production by Aspergillus niger using submerged fermentation
Source: PeerJ. 2020 Jul 7;8:e9425. doi: 10.7717/peerj.9425 (PMC7350912; doi:10.7717/peerj.9425)
Supplement: Supplemental Information 17 [file peerj-08-9425-s017.xlsx]

## Sheet: ورقة1
Glucose	A	B	C	Absorbance	U / ml	dry weight	linear growth
A. niger MH111398.1	1.005	1.005	1.004	1.00467	608.205	0.8253	3.23333
A. niger MH111400.1	1.007	1.01	1.02	1.01233	614.103	1.00373	6.56667
A. niger MH078565.1	1.003	1.004	1.007	1.00467	608.205	0.924867	5.8
A. niger MH078571.1	1.067	1.08	1.07	1.07233	660.256	1.1112	6.9
A. niger MH079049.1	1.05	1.063	1.053	1.05533	647.179	1.24463	7.16667
Fructose	A	B	C
A. niger MH111398.1	1.035	1.043	1.042	1.04	635.385	1.0489	6.1
A. niger MH111400.1	1.031	1.031	1.021	1.02767	625.897	1.23473	6.2
A. niger MH078565.1	1.016	1.008	1.031	1.01833	618.718	1.1253	6.36667
A. niger MH078571.1	1.15	1.172	1.118	1.14667	717.436	1.38193	6.5
A. niger MH079049.1	1.16	1.122	1.13	1.13733	710.256	1.28767	7.13333
Lactose	A	B	C
A. niger MH111398.1	1.005	1.005	1.004	1.00467	608.205	0.9035	6.66667
A. niger MH111400.1	1.012	1.01	1.018	1.01333	614.872	0.9354	7.03333
A. niger MH078565.1	1.003	1.004	1.004	1.00367	607.436	0.941133	6.3
A. niger MH078571.1	1.1	1.1	1.13	1.11	689.231	0.944067	7.03333
A. niger MH079049.1	1.06	1.097	1.1	1.08567	670.513	0.956667	7.03333
Galactose	A	B	C
A. niger MH111398.1	1.03	1.008	1.012	1.01667	617.436	0.979967	5.4
A. niger MH111400.1	1.007	1.006	1.008	1.007	610	1.0287	6.73333
A. niger MH078565.1	1.001	0.997	1.004	1.00067	605.128	0.914133	7.16667
A. niger MH078571.1	1.007	1.007	1.005	1.00633	609.487	0.985033	7.36667
A. niger MH079049.1	0.998	1.009	1.008	1.005	608.462	0.993433	6.5
Maltose	A	B	C
A. niger MH111398.1	1.065	1.06	1.047	1.05733	648.718	0.560067	5.36667
A. niger MH111400.1	1.004	1.003	1.007	1.00467	608.205	0.623767	6.96667
A. niger MH078565.1	1.008	1.009	1.009	1.00867	611.282	0.5553	7.23333
A. niger MH078571.1	1.07	1.073	1.073	1.072	660	0.706667	6.63333
A. niger MH079049.1	1.02	1.008	1.015	1.01433	615.641	0.695433	5.36667
Sucrose	A	B	C
A. niger MH111398.1	0.928	0.943	0.92	0.930333	551.026	0.673633	3.53333
A. niger MH111400.1	0.979	0.975	0.974	0.976	586.154	0.973067	7.1
A. niger MH078565.1	0.991	0.994	0.994	0.993	599.231	0.916667	3.83333
A. niger MH078571.1	1.005	1.003	0.997	1.00167	605.897	1.00673	3.86667
A. niger MH079049.1	0.99	0.997	1.001	0.996	601.538	1.109	3.16667
Strach	A	B	C
A. niger MH111398.1	0.94	0.93	0.936	0.935333	554.872	0.4209	3.73333
A. niger MH111400.1	0.953	0.943	0.941	0.945667	562.821	0.462133	5.93333
A. niger MH078565.1	0.963	0.963	0.955	0.960333	574.103	0.525467	6.1
A. niger MH078571.1	0.98	0.982	0.991	0.984333	592.564	0.6117	5.06667
A. niger MH079049.1	0.994	0.992	0.992	0.992667	598.974	0.618667	6.13333
