# Supplementary material for: Molecular, physiological, and biochemical characterization of extracellular lipase production by Aspergillus niger using submerged fermentation
Source: PeerJ. 2020 Jul 7;8:e9425. doi: 10.7717/peerj.9425 (PMC7350912; doi:10.7717/peerj.9425)
Supplement: Supplemental Information 18 [file peerj-08-9425-s018.xlsx]

## Sheet: ورقة1
Peptone	A	B	C	absorbance	U / ml	Dry wight	line growth
A. niger MH111398.1	1.037	1.035	1.026	1.03267	629.744	1.103	6.96667
A. niger MH111400.1	1.021	1.031	1.008	1.02	620	1.30843	7.06667
A. niger MH078565.1	1.013	1.038	1.0065	1.01917	619.359	1.3419	7
A. niger MH078571.1	1.143	1.143	1.138	1.14133	713.333	1.39617	7.6
A. niger MH079049.1	1.14	1.138	1.135	1.13767	710.513	1.42883	7.4
Yeast extract	A	B	C
A. niger MH111398.1	1.079	1.074	1.1	1.08433	669.487	1.03687	5.56667
A. niger MH111400.1	1.108	1.076	1.106	1.09667	678.974	1.20687	6.63333
A. niger MH078565.1	1.13	1.143	1.134	1.13567	708.974	1.13273	6.7
A. niger MH078571.1	1.179	1.176	1.179	1.178	741.538	1.29477	6.93333
A. niger MH079049.1	1.168	1.174	1.164	1.16867	734.359	1.30813	7.26667
Beef extract	A	B	C
A. niger MH111398.1	0.887	0.864	0.875	0.875333	508.718	0.978933	3.46667
A. niger MH111400.1	0.636	0.625	0.634	0.631667	321.282	1.12387	3.6
A. niger MH078565.1	0.863	0.872	0.868	0.867667	502.821	1.04007	4.96667
A. niger MH078571.1	0.833	0.831	0.858	0.840667	482.051	1.0847	4.63333
A. niger MH079049.1	0.887	0.894	0.897	0.892667	522.051	1.20403	6.53333
Sodium nitrate (NaNo3)	A	B	C
A. niger MH111398.1	0.941	0.943	0.95	0.944667	562.051	0.614133	4.63333
A. niger MH111400.1	0.963	0.963	0.905	0.943667	561.282	0.7022	3.93333
A. niger MH078565.1	0.961	0.866	0.838	0.888333	518.718	0.609367	5.46667
A. niger MH078571.1	0.774	0.776	0.783	0.777667	433.59	0.728667	4.8
A. niger MH079049.1	0.751	0.751	0.745	0.749	411.538	0.702	5.2
Casein	A	B	C
A. niger MH111398.1	0.955	0.954	0.965	0.958	572.308	0.772567	3.26667
A. niger MH111400.1	0.795	0.809	0.786	0.796667	448.205	0.910833	3.3
A. niger MH078565.1	0.59	0.575	0.574	0.579667	281.282	0.770733	4.13333
A. niger MH078571.1	0.618	0.627	0.628	0.624333	315.641	0.8916	4.46667
A. niger MH079049.1	0.783	0.776	0.758	0.772333	429.487	0.779	5.73333
Potassium nitrate (KNO3)	A	B	C
A. niger MH111398.1	0.85	0.841	0.835	0.842	483.077	0.517667	4.36667
A. niger MH111400.1	0.783	0.777	0.791	0.783667	438.205	0.6065	3.83333
A. niger MH078565.1	0.823	0.807	0.805	0.811667	459.744	0.525633	4.33333
A. niger MH078571.1	0.852	0.852	0.836	0.846667	486.667	0.818633	3.6
A. niger MH079049.1	0.864	0.848	0.859	0.857	494.615	0.838467	5.73333
