# Supplementary material for: Molecular, physiological, and biochemical characterization of extracellular lipase production by Aspergillus niger using submerged fermentation
Source: PeerJ. 2020 Jul 7;8:e9425. doi: 10.7717/peerj.9425 (PMC7350912; doi:10.7717/peerj.9425)
Supplement: Supplemental Information 19 [file peerj-08-9425-s019.xlsx]

## Sheet: ورقة1
0.5 ml	A	B	C	absorbance	U / L	dry weight
A. niger MH111398.1	0.574	0.4877	0.4972	0.519633	235.103	0.207833
A. niger MH111400.1	0.5816	0.5863	0.5732	0.580367	281.821	0.238267
A. niger MH078565.1	0.6318	0.6228	0.532	0.595533	293.487	0.182733
A. niger MH078571.1	0.5284	0.548	0.6631	0.579833	281.41	0.206533
A. niger MH079049.1	0.6053	0.5175	0.6935	0.605433	301.103	0.254567
1 ml	A	B	C
A. niger MH111398.1	0.753	0.6328	0.7053	0.697033	371.564	0.3115
A. niger MH111400.1	0.7236	0.7609	0.8679	0.784133	438.564	0.3971
A. niger MH078565.1	0.7322	0.8014	0.7324	0.755333	416.41	0.380467
A. niger MH078571.1	0.8159	0.8158	0.8319	0.8212	467.077	0.459
A. niger MH079049.1	0.8965	0.7389	0.8689	0.834767	477.513	0.4833
1.5 ml	A	B	C
A. niger MH111398.1	0.818	0.8564	0.803	0.8258	470.615	0.684767
A. niger MH111400.1	0.9764	0.807	0.8742	0.885867	516.821	0.788867
A. niger MH078565.1	0.8515	0.802	0.793	0.8155	462.692	0.645067
A. niger MH078571.1	0.811	0.9086	0.9156	0.8784	511.077	0.827067
A. niger MH079049.1	0.9654	0.965	0.854	0.928133	549.333	0.844833
2 ml	A	B	C
A. niger MH111398.1	1.125	1.116	1.115	1.11867	695.897	0.754367
A. niger MH111400.1	1.137	1.142	1.134	1.13767	710.513	0.823867
A. niger MH078565.1	1.152	1.147	1.148	1.149	719.231	0.753367
A. niger MH078571.1	1.216	1.207	1.211	1.21133	767.179	0.847433
A. niger MH079049.1	1.204	1.203	1.198	1.20167	759.744	0.856
2.5 ml	A	B	C
A. niger MH111398.1	1.133	1.135	1.142	1.13667	709.744	0.8237
A. niger MH111400.1	1.163	1.165	1.167	1.165	731.538	0.833967
A. niger MH078565.1	1.168	1.173	1.17	1.17033	735.641	0.879033
A. niger MH078571.1	1.254	1.243	1.244	1.247	794.615	1.08577
A. niger MH079049.1	1.24	1.235	1.239	1.238	787.692	1.01833
3 ml	A	B	C
A. niger MH111398.1	1.107	1.111	1.109	1.109	688.462	0.802133
A. niger MH111400.1	1.114	1.115	1.109	1.11267	691.282	0.819233
A. niger MH078565.1	1.1	1.107	1.126	1.111	690	0.8121
A. niger MH078571.1	1.198	1.206	1.194	1.19933	757.949	1.06537
A. niger MH079049.1	1.168	1.172	1.171	1.17033	735.641	0.995867
