# Supplementary material for: Molecular, physiological, and biochemical characterization of extracellular lipase production by Aspergillus niger using submerged fermentation
Source: PeerJ. 2020 Jul 7;8:e9425. doi: 10.7717/peerj.9425 (PMC7350912; doi:10.7717/peerj.9425)
Supplement: Supplemental Information 20 [file peerj-08-9425-s020.xlsx]

## Sheet: ورقة1
oliva oil 1.5	A	B	C	absorbance	U / ml	dry weight	linear growth
A. niger MH111398.1	0.937	0.945	0.935	0.939	557.692	0.863867	5.2
A. niger MH111400.1	0.931	0.942	0.93	0.934333	554.103	0.741367	5.06667
A. niger MH078565.1	0.976	0.976	0.977	0.976333	586.41	0.623267	4.3
A. niger MH078571.1	0.986	0.988	0.986	0.986667	594.359	0.791433	4.26667
A. niger MH079049.1	0.957	0.953	0.962	0.957333	571.795	0.702567	4.43333
oliva 2.0	A	B	C				Average
A. niger MH111398.1	1.076	1.082	1.075	1.07767	664.359	0.9458	5.76667
A. niger MH111400.1	1.094	1.078	1.085	1.08567	670.513	1.01363	4.96667
A. niger MH078565.1	1.12	1.128	1.115	1.121	697.692	0.9546	4.36667
A. niger MH078571.1	1.168	1.172	1.172	1.17067	735.897	1.13707	3.26667
A. niger MH079049.1	1.157	1.167	1.158	1.16067	728.205	1.23217	4.16667
oliva 2.5	A	B	C			Average	Average
A. niger MH111398.1	1.075	1.063	1.097	1.07833	664.872	1.0723	2.63333
A. niger MH111400.1	0.998	0.995	0.982	0.991667	598.205	1.03353	2.73333
A. niger MH078565.1	1.087	1.116	1.06	1.08767	672.051	1.27607	4.26667
A. niger MH078571.1	1.091	1.092	1.089	1.09067	674.359	1.04047	2.53333
A. niger MH079049.1	1.108	1.109	1.109	1.10867	688.205	1.03937	3.9
corn 1.5	A	B	C			Average	Average
A. niger MH111398.1	0.881	0.786	0.956	0.874333	507.949	0.617367	4.23333
A. niger MH111400.1	0.861	0.818	0.827	0.835333	477.949	0.5205	6.63333
A. niger MH078565.1	0.862	0.823	0.845	0.843333	484.103	0.717067	6.16667
A. niger MH078571.1	0.756	0.829	0.815	0.8	450.769	0.835467	4.16667
A. niger MH079049.1	0.841	0.808	0.871	0.84	481.538	0.848743	4.9
corn 2.0	A	B	C			Average	Average
A. niger MH111398.1	0.889	0.894	0.888	0.890333	520.256	0.6133	3.76667
A. niger MH111400.1	0.903	0.92	0.915	0.912667	537.436	0.6626	4.73333
A. niger MH078565.1	0.91	0.916	0.864	0.896667	525.128	0.718833	3.56667
A. niger MH078571.1	0.974	0.916	0.87	0.92	543.077	0.862533	4.7
A. niger MH079049.1	0.907	0.855	1.09	0.950667	566.667	0.834167	4.76667
corn 2.5	A	B	C			Average	Average
A. niger MH111398.1	1.072	1.058	1.051	1.06033	651.026	0.661667	4.5
A. niger MH111400.1	1.056	1.059	1.045	1.05333	645.641	0.614467	3.86667
A. niger MH078565.1	1.005	1.007	1.003	1.005	608.462	0.620067	3.8
A. niger MH078571.1	1.04	1.013	1.003	1.01867	618.974	0.837633	4.16667
A. niger MH079049.1	1.005	0.934	1.006	0.981667	590.513	0.8877	4.3
sun 1.5	A	B	C			Average	Average
A. niger MH111398.1	0.865	0.87	0.76	0.831667	475.128	0.8492	4.06667
A. niger MH111400.1	0.871	0.873	0.874	0.872667	506.667	0.8219	6.6
A. niger MH078565.1	0.844	0.844	0.843	0.843667	484.359	0.691533	6.23333
A. niger MH078571.1	0.899	0.923	0.875	0.899	526.923	0.703133	5.03333
A. niger MH079049.1	0.937	0.871	0.904	0.904	530.769	0.776167	5.9
sun 2.0	A	B	C			Average	Average
A. niger MH111398.1	0.916	0.914	0.921	0.917	540.769	0.907533	6.86667
A. niger MH111400.1	0.851	0.912	0.985	0.916	540	0.844133	6.5
A. niger MH078565.1	0.912	0.914	0.908	0.911333	536.41	0.739167	4.56667
A. niger MH078571.1	0.92	0.905	0.915	0.913333	537.949	0.8805	4.76667
A. niger MH079049.1	0.924	0.926	0.922	0.924	546.154	0.880467	5.6
sun 2.5	A	B	C			Average	Average
A. niger MH111398.1	0.918	0.912	0.914	0.914667	538.974	0.774667	4.16667
A. niger MH111400.1	0.884	0.908	0.869	0.887	517.692	0.744767	4.7
A. niger MH078565.1	0.905	0.803	0.879	0.862333	498.718	0.8366	5.26667
A. niger MH078571.1	0.897	0.906	0.915	0.906	532.308	0.680633	4.86667
A. niger MH079049.1	0.987	0.846	0.917	0.916667	540.513	0.692167	4.6
soy 1.5	A	B	C			Average	Average
A. niger MH111398.1	0.899	0.911	0.919	0.909667	535.128	0.6312	3.8
A. niger MH111400.1	0.92	0.914	0.916	0.916667	540.513	0.597233	5.63333
A. niger MH078565.1	0.87	0.896	0.86	0.875333	508.718	0.669433	3.8
A. niger MH078571.1	0.915	0.86	0.936	0.903667	530.513	0.661333	4.7
A. niger MH079049.1	0.908	0.915	0.919	0.914	538.462	0.6922	4.66667
soy 2.0	A	B	C			Average	Average
A. niger MH111398.1	0.931	0.925	0.932	0.929333	550.256	0.603133	4.16667
A. niger MH111400.1	0.928	0.955	0.934	0.939	557.692	0.721267	4.5
A. niger MH078565.1	0.925	0.93	0.924	0.926333	547.949	0.7151	4.06667
A. niger MH078571.1	0.914	0.904	0.914	0.910667	535.897	0.6754	5.36667
A. niger MH079049.1	0.935	0.942	0.944	0.940333	558.718	0.620567	5.73333
soy 2.5	A	B	C			Average	Average
A. niger MH111398.1	0.903	0.915	0.921	0.913	537.692	0.7121	4.13333
A. niger MH111400.1	0.899	0.892	0.895	0.895333	524.103	0.6977	6.03333
A. niger MH078565.1	0.879	0.889	0.901	0.889667	519.744	0.685667	4.26667
A. niger MH078571.1	0.899	0.886	0.895	0.893333	522.564	0.643433	5.43333
A. niger MH079049.1	0.891	0.901	0.899	0.897	525.385	0.704967	5.3
castor 1.5	A	B	C			Average	Average
A. niger MH111398.1	0.843	0.821	0.823	0.829	473.077	0.6848	4.5
A. niger MH111400.1	0.852	0.842	0.853	0.849	488.462	0.924133	3.86667
A. niger MH078565.1	0.885	0.885	0.851	0.873667	507.436	0.845267	3.23333
A. niger MH078571.1	0.856	0.853	0.874	0.861	497.692	0.807133	4.36667
A. niger MH079049.1	0.866	0.872	0.863	0.867	502.308	0.810333	5.16667
castor 2.0	A	B	C			Average	Average
A. niger MH111398.1	0.873	0.877	0.862	0.870667	505.128	0.766067	3.43333
A. niger MH111400.1	0.886	0.899	0.905	0.896667	525.128	0.794833	3.2
A. niger MH078565.1	1.005	1.034	1.054	1.031	628.462	0.7635	2.96667
A. niger MH078571.1	1.171	1.234	1.218	1.20767	764.359	0.779633	4.16667
A. niger MH079049.1	1.226	1.234	1.215	1.225	777.692	0.934267	5.43333
castor 2.5	A	B	C			Average	Average
A. niger MH111398.1	0.862	0.854	0.843	0.853	491.538	0.8752	2.1
A. niger MH111400.1	0.955	0.942	0.976	0.957667	572.051	0.846833	1.96667
A. niger MH078565.1	0.948	0.946	0.953	0.949	565.385	1.04	3.06667
A. niger MH078571.1	0.953	0.942	0.954	0.949667	565.897	0.925167	3.23333
A. niger MH079049.1	0.977	0.982	0.978	0.979	588.462	0.9291	5.3
palm 1.5	A	B	C	Average		Average	Average
A. niger MH111398.1	1.068	1.081	1.078	1.07567	662.821	0.656367	3.16667
A. niger MH111400.1	1.06	1.092	1.094	1.082	667.692	0.604733	3.03333
A. niger MH078565.1	1.13	1.138	1.145	1.13767	710.513	0.675833	2.46667
A. niger MH078571.1	1.168	1.172	1.171	1.17033	735.641	0.742533	3.73333
A. niger MH079049.1	1.165	1.165	1.166	1.16533	731.795	0.581567	5.03333
palm 2.0	A	B	C			Average	Average
A. niger MH111398.1	1.11	1.115	1.118	1.11433	692.564	0.677333	3.06667
A. niger MH111400.1	1.153	1.124	1.135	1.13733	710.256	0.644833	4.1
A. niger MH078565.1	1.16	1.153	1.162	1.15833	726.41	0.644567	3.53333
A. niger MH078571.1	1.218	1.218	1.217	1.21767	772.051	0.655733	4.96667
A. niger MH079049.1	1.183	1.189	1.228	1.2	758.462	0.6417	5.06667
palm2.5	A	B	C			Average	Average
A. niger MH111398.1	1.075	1.076	1.08	1.077	663.846	0.6394	2.93333
A. niger MH111400.1	1.076	1.094	1.075	1.08167	667.436	0.637633	3.96667
A. niger MH078565.1	1.036	1.03	1.054	1.04	635.385	0.624567	5.36667
A. niger MH078571.1	1.18	1.175	1.176	1.177	740.769	0.642333	4.06667
A. niger MH079049.1	1.15	1.146	1.166	1.154	723.077	0.6666	4.9
