# Supplementary material for: Molecular, physiological, and biochemical characterization of extracellular lipase production by Aspergillus niger using submerged fermentation
Source: PeerJ journal article supplement (doi:10.7717/peerj.9425), 2020-07-07
Supplement: Table_S1._Detection_of_(n=35)_fungal_isolates.pdf [file Table_S1._Detection_of_(n=35)_fungal_isolates.pdf]

**Table 1.** Detection of (n=35) fungal isolates ability to hydrolyze olive oil using the phenol red medium

| <b>Fungal isolates</b> | <b>Seed type / source</b> | <b>Halo of yellow (cm<sup>2</sup>)</b> |
|------------------------|---------------------------|----------------------------------------|
| <i>Aspergillus sp.</i> | Cashew / Dammam           | 48.36                                  |
| <i>Penicillium sp.</i> | Pistachio / Jubail        | 47.73                                  |
| <i>Aspergillus sp.</i> | Pistachio / hassa         | 45.84                                  |
| <i>Aspergillus sp.</i> | Bean / Dammam             | 42.08                                  |
| <i>Aspergillus sp.</i> | Almonds / Jubail          | 40.82                                  |
| <i>Aspergillus sp.</i> | Bean / Khobar             | 40.19                                  |
| <i>Aspergillus sp.</i> | Cashew / Jubail           | 40.19                                  |
| <i>Aspergillus sp.</i> | Pistachio / Jubail        | 37.68                                  |
| <i>penicillium sp.</i> | Corn / Khobar             | 35.8                                   |
| <i>Penicillium sp.</i> | Pistachio / Khobar        | 34.54                                  |
| <i>Aspergillus sp.</i> | Almonds / Khobar          | 34.54                                  |
| <i>Aspergillus sp.</i> | Pistachio / Dammam        | 33.91                                  |
| <i>Penicillium sp.</i> | Cashew / Jubail           | 30.14                                  |
| <i>Penicillium sp.</i> | Pistachio / Khobar        | 29.52                                  |
| <i>Aspergillus sp.</i> | Pistachio / Hafr Al batin | 28.89                                  |
| <i>penicillium sp.</i> | Cashew / Jubail           | 28.89                                  |
| <i>Aspergillus sp.</i> | Pistachio / Khobar        | 28.26                                  |
| <i>Penicillium sp.</i> | Bean / Jubail             | 27.63                                  |
| <i>Penicillium sp.</i> | Nut / Jubail              | 26.38                                  |
| <i>Penicillium sp.</i> | Bean / Jubail             | 21.98                                  |
| <i>Penicillium sp.</i> | Nut / Dammam              | 21.98                                  |
| <i>Alternaria sp.</i>  | Almonds / Hassa           | 15.7                                   |
| <i>Aspergillus sp.</i> | Cashew / Jubail           | -                                      |
| <i>Aspergillus sp.</i> | Cashew / Jubail           | -                                      |
| <i>Fusarium sp.</i>    | Corn / Dammam             | -                                      |
| <i>fusarium sp.</i>    | Corn / Khobar             | -                                      |
| <i>fusarium sp.</i>    | Corn / Jubail             | -                                      |
| <i>fusarium sp.</i>    | Corn / Hassa              | -                                      |
| <i>fusarium sp.</i>    | Corn / Hafr Al batin      | -                                      |
| <i>Alternaria sp.</i>  | Pistachio / Dammam        | -                                      |
| <i>Alternaria sp.</i>  | Pistachio / Khobar        | -                                      |
| <i>Alternaria sp.</i>  | Pistachio / Hafr Al batin | -                                      |
| <i>Alternaria sp.</i>  | Bean / Dammam             | -                                      |
| <i>Alternaria sp.</i>  | Almonds / Khobar          | -                                      |
| <i>Alternaria sp.</i>  | Almonds / Hassa           | -                                      |
