# Supplementary material for: Molecular, physiological, and biochemical characterization of extracellular lipase production by Aspergillus niger using submerged fermentation
Source: PeerJ journal article supplement (doi:10.7717/peerj.9425), 2020-07-07
Supplement: Table_S2._The_effect_of_range_of_temperatures.pdf [file Table_S2._The_effect_of_range_of_temperatures.pdf]

**Table 2.** The effect of range of temperatures on the enzymatic activity of the 5 highest lipase producers of *Aspergillus sp.* Isolates:

| Temperature              | Lipase activity (U/ml)<br>±S.D | Dry weight (g/flask)<br>±S.D | Diameter (cm)<br>±S.D |
|--------------------------|--------------------------------|------------------------------|-----------------------|
| <b>15 °C</b>             |                                |                              |                       |
| <i>A. niger</i> MH111398 | 49.74 ± 2.35                   | 0.708 ± 0.041                | 2.4 ± 0.1             |
| <i>A. niger</i> MH111400 | 19.74 ± 4.44                   | 0.442 ± 0.077                | 2.6 ± 0.1             |
| <i>A. niger</i> MH078565 | 89.23 ± 21.54                  | 0.438 ± 0.044                | 2.2 ± 0.1             |
| <i>A. niger</i> MH078571 | 121.79 ± 16.18                 | 0.572 ± 0.168                | 2.53 ± 0.058          |
| <i>A. niger</i> MH079049 | 24.87 ± 8.92                   | 0.42 ± 0.159                 | 2.06 ± 0.058          |
| <b>20 °C</b>             |                                |                              |                       |
| <i>A. niger</i> MH111398 | 155.64 ± 10.04                 | 0.466 ± 0.033                | 2.13 ± 0.153          |
| <i>A. niger</i> MH111400 | 187.18 ± 6.89                  | 0.365 ± 0.123                | 2.1 ± 0.1             |
| <i>A. niger</i> MH078565 | 214.87 ± 6.22                  | 0.47 ± 0.085                 | 2.26 ± 0.252          |
| <i>A. niger</i> MH078571 | 277.44 ± 4.51                  | 0.50 ± 0.015                 | 2.23 ± 0.208          |
| <i>A. niger</i> MH079049 | 247.95 ± 14.94                 | 0.460 ± 0.125                | 2.2 ± 0.1             |
| <b>25 °C</b>             |                                |                              |                       |
| <i>A. niger</i> MH111398 | 324.3 ± 3.87                   | 0.41 ± 0.058                 | 5.4 ± 0.625           |
| <i>A. niger</i> MH111400 | 261.79 ± 6.72                  | 0.412 ± 0.042                | 5.53 ± 0.115          |
| <i>A. niger</i> MH078565 | 276.41 ± 5.12                  | 0.291 ± 0.023                | 5.5 ± 0.1             |
| <i>A. niger</i> MH078571 | 386.15 ± 9.61                  | 0.63 ± 0.047                 | 5.93 ± 0.493          |
| <i>A. niger</i> MH079049 | 402.31 ± 3.53                  | 0. ± 0.026                   | 4.77 ± 0.153          |
| <b>30 °C</b>             |                                |                              |                       |
| <i>A. niger</i> MH111398 | 334.36 ± 6.72                  | 0.323 ± 0.099                | 5.1 ± 0.1             |
| <i>A. niger</i> MH111400 | 329.49 ± 6.72                  | 0.354 ± 0.062                | 5.97 ± 0.058          |
| <i>A. niger</i> MH078565 | 407.436 ± 8.58                 | 0.306 ± 0.164                | 5.23 ± 0.252          |
| <i>A. niger</i> MH078571 | 445.39 ± 8.32                  | 0.33 ± 0.084                 | 5.93 ± 0.153          |
| <i>A. niger</i> MH079049 | 445.9 ± 6.45                   | 0.34 ± 0.057                 | 5.5 ± 0.1             |
| <b>35 °C</b>             |                                |                              |                       |
| <i>A. niger</i> MH111398 | 409.49 ± 3.47                  | 0.29 ± 0.047                 | 4.4 ± 0.794           |
| <i>A. niger</i> MH111400 | 421.03 ± 20.39                 | 0.384 ± 0.023                | 6.1 ± 0.2             |
| <i>A. niger</i> MH078565 | 436.92 ± 3.35                  | 0.3272 ± 0.044               | 5.86 ± 0.306          |
| <i>A. niger</i> MH078571 | 487.44 ± 13.08                 | 0.375 ± 0.082                | 4.3 ± 0.608           |

|                            |               |              |             |
|----------------------------|---------------|--------------|-------------|
| <i>A. niger</i> MH079049   | 500.77 ±9.33  | 0.288 ±0.033 | 4.7 ±0.2    |
| <b>40 °C</b>               |               |              |             |
| <i>A. niger</i> MH111398.1 | 490.77 ±11.49 | 0.095 ±0.073 | 4.33 ±0.723 |
| <i>A. niger</i> MH111400.1 | 470.51 ±11.95 | 0.225 ±0.055 | 3.73 ±0.153 |
| <i>A. niger</i> MH078565.1 | 480.77 ±10.41 | 0.166 ±0.026 | 3.6 ±0.100  |
| <i>A. niger</i> MH078571.1 | 575.9 ±9.56   | 0.292 ±0.030 | 3.6 ±0.794  |
| <i>A. niger</i> MH079049.1 | 569.23 ±6.30  | 0.224 ±0.057 | 2.77±0.208  |
| <b>45 °C</b>               |               |              |             |
| <i>A. niger</i> MH078571.1 | 403.3 ±4.24   | 0.097 ±0.059 | –           |
| <i>A. niger</i> MH079049.1 | 524.87 ±6.94  | 0.090 ±0.090 | –           |

\* Results are averages of three replicates
