# Supplementary material for: Molecular, physiological, and biochemical characterization of extracellular lipase production by Aspergillus niger using submerged fermentation
Source: PeerJ journal article supplement (doi:10.7717/peerj.9425), 2020-07-07
Supplement: Table_S3._The_effect_of_range_of_pH_on.pdf [file Table_S3._The_effect_of_range_of_pH_on.pdf]

**Table 3.** The effect of range of pH on the enzymatic activity of the 5 highest lipase producers of *Aspergillus sp.* Isolates:

| pH                       | Lipase activity (U/ml)<br>±S.D | Dry weight (g/flask)<br>±S.D | Diameter (cm)<br>±S.D |
|--------------------------|--------------------------------|------------------------------|-----------------------|
| <b>3 pH</b>              |                                |                              |                       |
| <i>A. niger</i> MH111398 | 11.025±6.22                    | 0.371±0.056                  | –                     |
| <i>A. niger</i> MH111400 | 21.538±3.35                    | 0.401±0.146                  | –                     |
| <i>A. niger</i> MH078565 | 5.385±1.33                     | 0.286±0.048                  | –                     |
| <i>A. niger</i> MH078571 | 83.077±2.66                    | 0.353±0.039                  | –                     |
| <i>A. niger</i> MH079049 | 83.59±8.92                     | 0.349±0.033                  | –                     |
| <b>3.5 pH</b>            |                                |                              |                       |
| <i>A. niger</i> MH111398 | 78.205±4.51                    | 0.27±0.076                   | –                     |
| <i>A. niger</i> MH111400 | 46.41±4.95                     | 0.269±0.049                  | –                     |
| <i>A. niger</i> MH078565 | 22.051±5.56                    | 0.346 ±0.038                 | –                     |
| <i>A. niger</i> MH078571 | 118.72±5.67                    | 0.342±0.039                  | –                     |
| <i>A. niger</i> MH079049 | 100±2.04                       | 0.349±0.038                  | –                     |
| <b>4 pH</b>              |                                |                              |                       |
| <i>A. niger</i> MH111398 | 89.49±4.24                     | 0.364±0.009                  | –                     |
| <i>A. niger</i> MH111400 | 75.897±3.95                    | 0.386±0.010                  | –                     |
| <i>A. niger</i> MH078565 | 40.256±8.47                    | 0.488±0.022                  | –                     |
| <i>A. niger</i> MH078571 | 159.49±3.11                    | 0.426±0.013                  | –                     |
| <i>A. niger</i> MH079049 | 120.26±1.18                    | 0.45±0.017                   | –                     |
| <b>4.5 pH</b>            |                                |                              |                       |
| <i>A. niger</i> MH111398 | 108.46±9.45                    | 0.440±0.023                  | 3.53±0.351            |
| <i>A. niger</i> MH111400 | 102.05±7.15                    | 0.428±0.007                  | 3.43±0.058            |
| <i>A. niger</i> MH078565 | 68.205±14.23                   | 0.444±0.031                  | 3.8±0.2               |
| <i>A. niger</i> MH078571 | 183.59±2.22                    | 0.485±0.013                  | 3.93±0.306            |
| <i>A. niger</i> MH079049 | 162.56±5.97                    | 0.496±0.042                  | 4.33±0.153            |
| <b>5 pH</b>              |                                |                              |                       |
| <i>A. niger</i> MH111398 | 158.72±8.30                    | 0.24±0.104                   | 4.27±0.252            |
| <i>A. niger</i> MH111400 | 134.36±8.88                    | 0.437±0.033                  | 4.4±0.624             |
| <i>A. niger</i> MH078565 | 93.08±5.38                     | 0.392±0.025                  | 5.067±0.208           |
| <i>A. niger</i> MH078571 | 218.21±7.59                    | 0.356±0.008                  | 5.4±0.1               |
| <i>A. niger</i> MH079049 | 205.64±3.20                    | 0.382±0.017                  | 5.53±0.208            |
| <b>5.5 pH</b>            |                                |                              |                       |
| <i>A. niger</i> MH111398 | 237.95±6.89                    | 0.261±0.036                  | 4.83±0.153            |
| <i>A. niger</i> MH111400 | 161.54±4.07                    | 0.332±0.036                  | 4.47±0.153            |
| <i>A. niger</i> MH078565 | 198.974±3.95                   | 0.308±0.015                  | 4.7±0.2               |

|                          |              |             |            |
|--------------------------|--------------|-------------|------------|
| <i>A. niger</i> MH078571 | 278.97±5.12  | 0.312±0.065 | 4.73±0.252 |
| <i>A. niger</i> MH079049 | 270.51±7.11  | 0.379±0.070 | 5.27±0.208 |
| <b>6 pH</b>              |              |             |            |
| <i>A. niger</i> MH111398 | 348.72±5.00  | 0.477±0.042 | 4.3±0.265  |
| <i>A. niger</i> MH111400 | 366.92±10.41 | 0.519±0.041 | 4.33±0.153 |
| <i>A. niger</i> MH078565 | 335.39±12.71 | 0.514±0.009 | 4.57±0.208 |
| <i>A. niger</i> MH078571 | 430±12.38    | 0.601±0.065 | 4.8±0.3    |
| <i>A. niger</i> MH079049 | 423.85±12.09 | 0.591±0.074 | 4.37±0.321 |
| <b>6.5 pH</b>            |              |             |            |
| <i>A. niger</i> MH111398 | 492.31±4.07  | 0.541±0.037 | 3.07±0.153 |
| <i>A. niger</i> MH111400 | 470.77±2.04  | 0.584±0.022 | 3.67±0.208 |
| <i>A. niger</i> MH078565 | 477.18±2.47  | 0.671±0.057 | 3.03±0.058 |
| <i>A. niger</i> MH078571 | 577.44±2.47  | 0.638±0.048 | 3.6±0.1    |
| <i>A. niger</i> MH079049 | 567.18±4.51  | 0.656±0.049 | 3.97±0.153 |
| <b>7 pH</b>              |              |             |            |
| <i>A. niger</i> MH111398 | 503.85±8.87  | 0.643±0.051 | 4.37±0.153 |
| <i>A. niger</i> MH111400 | 490.77±4.80  | 0.607±0.087 | 4.73±0.153 |
| <i>A. niger</i> MH078565 | 497.44±11.13 | 0.638±0.046 | 4.67±0.208 |
| <i>A. niger</i> MH078571 | 588.21±2.70  | 0.685±0.039 | 4.7±0.2    |
| <i>A. niger</i> MH079049 | 592.56±5.56  | 0.686±0.024 | 4.63±0.058 |
| <b>7.5 pH</b>            |              |             |            |
| <i>A. niger</i> MH111398 | 549.49±5.12  | 0.449±0.025 | 5.5±0.200  |
| <i>A. niger</i> MH111400 | 510.26±2.35  | 0.276±0.024 | 5.27±0.153 |
| <i>A. niger</i> MH078565 | 553.85±6.11  | 0.271±0.029 | 5.2±0.2    |
| <i>A. niger</i> MH078571 | 610.77±5.81  | 0.27±0.027  | 5.6±0.1    |
| <i>A. niger</i> MH079049 | 606.15±4.80  | 0.32±0.093  | 5.8±0.1    |
| <b>8 pH</b>              |              |             |            |
| <i>A. niger</i> MH111398 | 484.1 ±2.91  | 0.401±0.074 | 4.8±0.265  |
| <i>A. niger</i> MH111400 | 445.64±7.15  | 0.434±0.095 | 4.67±0.153 |
| <i>A. niger</i> MH078565 | 477.95±8.47  | 0.346±0.059 | 4.6±0.1    |
| <i>A. niger</i> MH078571 | 510±15.71    | 0.306±0.225 | 4.87±0.153 |
| <i>A. niger</i> MH079049 | 487.18±1.18  | 0.512±0.047 | 5.3±0.252  |
| <b>8.5 pH</b>            |              |             |            |
| <i>A. niger</i> MH078571 | 473.85±3.08  | 0.374±0.075 | 4.47±0.252 |
| <i>A. niger</i> MH079049 | 470.51±8.23  | 0.475±0.064 | 4.7±0.2    |

\* Results are averages of three replicates
