# Supplementary material for: Molecular, physiological, and biochemical characterization of extracellular lipase production by Aspergillus niger using submerged fermentation
Source: PeerJ journal article supplement (doi:10.7717/peerj.9425), 2020-07-07
Supplement: Table_S5._The_effect_of_different_carbon_sources.pdf [file Table_S5._The_effect_of_different_carbon_sources.pdf]

**Table 5.** The effect of different carbon sources on the enzymatic activity of the 5 highest lipase producers of *Aspergillus sp.* Isolates:

| Carbon source            | Lipase activity (U/ml) $\pm$ S.D | Dry weight (g/flask) $\pm$ S.D | Diameter (cm) $\pm$ S.D |
|--------------------------|----------------------------------|--------------------------------|-------------------------|
| <b>Glucose</b>           |                                  |                                |                         |
| <i>A. niger</i> MH111398 | 608.21 $\pm$ 0.44                | 0.825 $\pm$ 0.130              | 3.23 $\pm$ 0.208        |
| <i>A. niger</i> MH111400 | 614.10 $\pm$ 5.24                | 1.004 $\pm$ 0.174              | 6.57 $\pm$ 0.404        |
| <i>A. niger</i> MH078565 | 608.21 $\pm$ 1.60                | 0.925 $\pm$ 0.121              | 5.8 $\pm$ 0.625         |
| <i>A. niger</i> MH078571 | 660.26 $\pm$ 5.24                | 1.11 $\pm$ 0.064               | 6.9 $\pm$ 0.2           |
| <i>A. niger</i> MH079049 | 647.18 $\pm$ 5.24                | 1.245 $\pm$ 0.095              | 7.17 $\pm$ 0.153        |
| <b>Fructose</b>          |                                  |                                |                         |
| <i>A. niger</i> MH111398 | 635.39 $\pm$ 3.35                | 1.05 $\pm$ 0.063               | 6.1 $\pm$ 0.3           |
| <i>A. niger</i> MH111400 | 625.9 $\pm$ 4.44                 | 1.24 $\pm$ 0.063               | 6.2 $\pm$ 0.265         |
| <i>A. niger</i> MH078565 | 618.72 $\pm$ 8.98                | 1.13 $\pm$ 0.073               | 6.37 $\pm$ 0.351        |
| <i>A. niger</i> MH078571 | 717.44 $\pm$ 20.89               | 1.39 $\pm$ 0.082               | 6.5 $\pm$ 0.2           |
| <i>A. niger</i> MH079049 | 710.26 $\pm$ 15.41               | 1.288 $\pm$ 0.034              | 7.13 $\pm$ 0.153        |
| <b>Lactose</b>           |                                  |                                |                         |
| <i>A. niger</i> MH111398 | 608.21 $\pm$ 0.44                | 0.904 $\pm$ 0.122              | 6.67 $\pm$ 0.153        |
| <i>A. niger</i> MH111400 | 614.87 $\pm$ 3.20                | 0.94 $\pm$ 0.131               | 7.03 $\pm$ 0.351        |
| <i>A. niger</i> MH078565 | 607.44 $\pm$ 0.44                | 0.941 $\pm$ 0.075              | 6.3 $\pm$ 0.265         |
| <i>A. niger</i> MH078571 | 689.23 $\pm$ 13.32               | 0.944 $\pm$ 0.085              | 7.03 $\pm$ 0.153        |
| <i>A. niger</i> MH079049 | 670.51 $\pm$ 17.14               | 0.957 $\pm$ 0.209              | 7.03 $\pm$ 0.252        |
| <b>Galactose</b>         |                                  |                                |                         |
| <i>A. niger</i> MH111398 | 617.44 $\pm$ 9.01                | 0.98 $\pm$ 0.159               | 5.4 $\pm$ 0.2           |
| <i>A. niger</i> MH111400 | 610 $\pm$ 0.77                   | 1.029 $\pm$ 0.160              | 6.73 $\pm$ 0.306        |
| <i>A. niger</i> MH078565 | 605.13 $\pm$ 2.70                | 0.914 $\pm$ 0.071              | 7.17 $\pm$ 0.208        |
| <i>A. niger</i> MH078571 | 609.49 $\pm$ 0.89                | 0.985 $\pm$ 0.016              | 7.37 $\pm$ 0.252        |
| <i>A. niger</i> MH079049 | 608.47 $\pm$ 4.68                | 0.994 $\pm$ 0.057              | 6.5 $\pm$ 0.10          |
| <b>Maltose</b>           |                                  |                                |                         |
| <i>A. niger</i> MH111398 | 648.72 $\pm$ 7.15                | 0.561 $\pm$ 0.012              | 5.37 $\pm$ 0.115        |
| <i>A. niger</i> MH111400 | 608.21 $\pm$ 1.60                | 0.624 $\pm$ 0.004              | 6.97 $\pm$ 0.306        |
| <i>A. niger</i> MH078565 | 611.28 $\pm$ 0.44                | 0.555 $\pm$ 0.040              | 7.23 $\pm$ 0.208        |
| <i>A. niger</i> MH078571 | 660 $\pm$ 1.33                   | 0.707 $\pm$ 0.022              | 6.63 $\pm$ 0.208        |
| <i>A. niger</i> MH079049 | 615.64 $\pm$ 4.64                | 0.695 $\pm$ 0.036              | 5.37 $\pm$ 0.208        |
| <b>Sucrose</b>           |                                  |                                |                         |
| <i>A. niger</i> MH111398 | 551.03 $\pm$ 8.98                | 0.674 $\pm$ 0.073              | 3.53 $\pm$ 0.153        |
| <i>A. niger</i> MH111400 | 586.15 $\pm$ 2.04                | 0.974 $\pm$ 0.082              | 7.1 $\pm$ 0.265         |
| <i>A. niger</i> MH078565 | 599.23 $\pm$ 1.33                | 0.917 $\pm$ 0.018              | 3.83 $\pm$ 0.153        |
| <i>A. niger</i> MH078571 | 605.9 $\pm$ 3.20                 | 1.007 $\pm$ 0.126              | 3.87 $\pm$ 0.379        |
| <i>A. niger</i> MH079049 | 601.54 $\pm$ 4.28                | 1.109 $\pm$ 0.116              | 3.17 $\pm$ 0.351        |

| <b>Starch</b>            |             |              |            |
|--------------------------|-------------|--------------|------------|
| <i>A. niger</i> MH111398 | 554.87±3.87 | 0.4209±0.031 | 3.73±0.252 |
| <i>A. niger</i> MH111400 | 562.82±4.95 | 0.462±0.035  | 5.93±0.252 |
| <i>A. niger</i> MH078565 | 574.1±3.55  | 0.525±0.030  | 6.1±0.173  |
| <i>A. niger</i> MH078571 | 592.56±4.51 | 0.612±0.027  | 5.07±0.404 |
| <i>A. niger</i> MH079049 | 598.97±0.89 | 0.619±0.051  | 6.13±0.153 |

\* Results are averages of three replicates
