# Supplementary material for: Molecular, physiological, and biochemical characterization of extracellular lipase production by Aspergillus niger using submerged fermentation
Source: PeerJ journal article supplement (doi:10.7717/peerj.9425), 2020-07-07
Supplement: Table_S7._The_effect_of_various_inoculum_volume.pdf [file Table_S7._The_effect_of_various_inoculum_volume.pdf]

**Table 7.** The effect of various inoculum volume on the enzymatic activity of the 5 highest lipase producers of *Aspergillus sp.* Isolates:

| Inoculum volume          | Lipase activity (U/ml)<br>±S.D | dry weight (g/flask) |
|--------------------------|--------------------------------|----------------------|
| <b>0.5 ml</b>            |                                |                      |
| <i>A. niger</i> MH111398 | 235.10±36.40                   | 0.208±0.059          |
| <i>A. niger</i> MH111400 | 281.82±5.10                    | 0.239±0.065          |
| <i>A. niger</i> MH078565 | 293.49±42.47                   | 0.183±0.034          |
| <i>A. niger</i> MH078571 | 281.41±55.98                   | 0.207±0.049          |
| <i>A. niger</i> MH079049 | 301.1±67.69                    | 0.255±0.062          |
| <b>1 ml</b>              |                                |                      |
| <i>A. niger</i> MH111398 | 371.56±46.56                   | 0.312±0.015          |
| <i>A. niger</i> MH111400 | 438.56±57.62                   | 0.397±0.017          |
| <i>A. niger</i> MH078565 | 416.41±30.69                   | 0.381±0.016          |
| <i>A. niger</i> MH078571 | 467.08±7.13                    | 0.459±0.040          |
| <i>A. niger</i> MH079049 | 477.51±64.74                   | 0.483±0.056          |
| <b>1.5 ml</b>            |                                |                      |
| <i>A. niger</i> MH111398 | 470.62±21.19                   | 0.685±0.094          |
| <i>A. niger</i> MH111400 | 516.82±65.62                   | 0.789±0.035          |
| <i>A. niger</i> MH078565 | 462.69±24.23                   | 0.645±0.039          |
| <i>A. niger</i> MH078571 | 511.08±44.98                   | 0.827±0.035          |
| <i>A. niger</i> MH079049 | 549.33±49.39                   | 0.845±0.096          |
| <b>2 ml</b>              |                                |                      |
| <i>A. niger</i> MH111398 | 695.9±4.24                     | 0.754±0.104          |
| <i>A. niger</i> MH111400 | 710.51±3.11                    | 0.824±0.042          |
| <i>A. niger</i> MH078565 | 719.23±2.04                    | 0.754±0.044          |
| <i>A. niger</i> MH078571 | 767.18±3.47                    | 0.848±0.083          |
| <i>A. niger</i> MH079049 | 759.74±2.47                    | 0.856±0.039          |
| <b>2.5 ml</b>            |                                |                      |
| <i>A. niger</i> MH111398 | 709.74±3.64                    | 0.824±0.044          |
| <i>A. niger</i> MH111400 | 731.54±1.54                    | 0.834±0.039          |
| <i>A. niger</i> MH078565 | 735.64±1.94                    | 0.879±0.016          |
| <i>A. niger</i> MH078571 | 794.62±4.68                    | 1.086±0.120          |
| <i>A. niger</i> MH079049 | 787.69±2.04                    | 1.018±0.059          |
| <b>3 ml</b>              |                                |                      |
| <i>A. niger</i> MH111398 | 688.46±1.54                    | 0.802±0.086          |

|                          |             |             |
|--------------------------|-------------|-------------|
| <i>A. niger</i> MH111400 | 691.28±2.47 | 0.819±0.060 |
| <i>A. niger</i> MH078565 | 690±10.35   | 0.812±0.058 |
| <i>A. niger</i> MH078571 | 757.95±4.70 | 1.065±0.108 |
| <i>A. niger</i> MH079049 | 735.64±1.60 | 0.996±0.069 |

\* Results are averages of three replicates
